# Supplementary material for: Ratiometric electrochemical detection of β-galactosidase
Source: Royal Society of Chemistry journal article supplement (doi:10.1039/c7ob01593c), 2017-01-01

## Electronic Supplementary Information

for

### **Ratiometric Electrochemical Detection of $\beta$ -Galactosidase**

S. A. Spring,<sup>a</sup> S. Goggins,<sup>a\*</sup> and C. G. Frost<sup>a</sup>

Department of Chemistry, University of Bath, Bath, BA2 7AY, UK

\*Corresponding author. [s.goggins@bath.ac.uk](mailto:s.goggins@bath.ac.uk)

### General information:

Proton and carbon nuclear magnetic resonance (NMR) spectra were recorded on an Agilent Technologies 500 MHz spectrometer ( $^1\text{H}$  NMR at 500 MHz and  $^{13}\text{C}$  NMR at 126 MHz). Chemical shifts for protons are reported in parts per million downfield from tetramethylsilane and are referenced to residual protium in the solvent ( $^1\text{H}$  NMR:  $\text{CHCl}_3$  at 7.26 ppm,  $\text{CD}_2\text{HOD}$  at 3.31 ppm, and  $\text{C}_6\text{H}_6$  at 7.16 ppm). Chemical shifts for carbons are reported in parts per million downfield from tetramethylsilane and are referenced to the carbon resonances of the solvent peak ( $^{13}\text{C}$  NMR:  $\text{CDCl}_3$  at 77.0 ppm, MeOH at 49.1, and  $\text{C}_6\text{H}_6$  at 128.14). NMR data are represented as follows: chemical shift, integration, multiplicity (s = singlet, d = doublet, dd = doublet of doublets, ddd = doublet of doublet of doublets, t = triplet, q = quartet, m = multiplet), coupling constants (Hz). IR spectra were recorded on a Perkin-Elmer 1600 FT IR spectrophotometer, with absorbencies quoted as  $\nu$  in  $\text{cm}^{-1}$ . High resolution mass spectrometry was performed on a Bruker MaXis HD electrospray ionisation quadrupole time-of-flight (ESI-QTOF) mass spectrometer. Melting points were obtained on a OptiMelt MPA100 automated melting point system. Electrochemical analysis was performed on a Metrohm Autolab PGSTAT30 potentiostat. Analytical thin layer chromatography (TLC) were performed using aluminium-backed plates coated with Alugram<sup>®</sup> SIL G/UV254 purchased from Macherey-Nagel and visualised by UV light (254 nm) and/or Vanillin staining. Silica gel column chromatography was carried out using 60 Å, 200-400 mesh particle size silica gel purchased from Sigma-Aldrich.

### Materials:

All reactions were carried out under an atmosphere of nitrogen, in oven-dried glassware unless otherwise stated. Dichloromethane, tetrahydrofuran (THF) and toluene were dried and degassed by passing through anhydrous alumina columns using an Innovative Technology Inc. PS-400-7 solvent purification system and stored under an atmosphere of argon prior to use. D-galactose pentaacetate was purchased from Carbosynth. All other chemicals were purchased from Sigma-Aldrich. All other chemicals were used as received.  $\beta$ -galactosidase was purchased as a lyophilised solid from Sigma Aldrich and stored in a  $-20\text{ }^\circ\text{C}$  freezer. Prior to use a stock solution of the enzyme was prepared using 50 mM Tris buffer (pH 9) and stored at  $4\text{ }^\circ\text{C}$  until immediate use.

### Electrochemical analysis:

Electrochemical analysis was performed by applying a 10  $\mu\text{L}$  sample to screen-printed electrochemical cell equipped with carbon working and counter electrodes and a silver (pseudo Ag/AgCl) reference electrode. The potential across the cell was powered by a Metrohm Autolab PGSTAT30 potentiostat controlled by a laptop running General Purpose Electrochemical System (GPES) software in differential pulse mode (modulation = 0.04 s, interval = 0.1 s, initial voltage =  $-400\text{ mV}$ , end voltage =  $600\text{ mV}$ , step potential =  $3\text{ mV}$ , modulation amplitude  $49.95\text{ mV}$ ). Post-scan, a baseline correction (moving average: peak width = 0.03) was performed. Peak integrals were obtained using the 'peak search' function and conversions calculated using the equation:  $Conversion (\%) = \frac{(f_3)}{(f_3 + f_1)} \times 100$

## (Per-(O)-acetyl- $\beta$ -D-galactopyranosyl)-4-oxybenzaldehyde

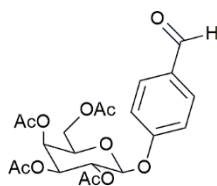

$\beta$ -D-galactopyranose pentaacetate (3.90 g, 10 mmol, 1 eq.) was suspended in HBr (45 % in AcOH, 10 mL) and acetic acid (5 mL) was added. The reaction was stirred for 1 h after which DCM (20 mL) and ice (20 g) were added. The organic layer was separated and the aqueous later was extracted with DCM (2 x 30 mL). The combined organic layers were washed with water (3 x 30 mL), sat. NaHCO<sub>3</sub> (30 mL), brine (20 mL), then dried over MgSO<sub>4</sub> and the solvent was removed *in vacuo*. Purification *via* silica gel column chromatography (DCM 19:1 MeOH ( $R_f$  = 0.69)) gave the brominated intermediate as a pale yellow oil (3.65 g, 89%).

A solution of the intermediate (3.65 g) in acetone (20 mL) was added dropwise to a solution of 4-hydroxybenzaldehyde (2.44 g, 20 mmol, 2 eq.) in NaOH (1 m, 20 mL) and the reaction was stirred for 20 h, after which DCM (20 mL) and water (20 mL) were added. The organic layer was separated and aqueous layer extracted with DCM (2 x 20 mL). The combined organic layers were washed with NaOH (2 x 30 mL), water (20 mL), brine (20 mL), then dried over MgSO<sub>4</sub> and the solvent was removed *in vacuo*. Purification *via* silica gel column chromatography (DCM 19:1 MeOH ( $R_f$  = 0.41)) gave the title compound as a pale yellow oil. Trituration with ethanol gave the title compound as a white crystalline solid. (2.28 g, 50% over two steps).

**Mp:** 117–118 °C (lit.<sup>1</sup> 115–117 °C)

**IR** (solid cm<sup>-1</sup>): 2984, 1743, 1692, 1600, 1584, 1508, 1368, 1208, 1159, 1041.

**<sup>1</sup>H NMR** (500 MHz, CDCl<sub>3</sub>): 9.93 (1 H, s), 7.90–7.74 (2 H, m), 7.13–7.05 (2 H, m), 5.52 (1 H, dd,  $J$  10.4, 7.9), 5.47 (1 H, dd,  $J$  3.5, 1.1), 5.17 (1 H, d,  $J$  7.9), 5.13 (1 H, dd,  $J$  10.4, 3.5), 4.23 (1 H, dd,  $J$  11.1, 7.0), 4.16 (1 H, dd,  $J$  11.1, 6.1), 4.12 (1 H, ddd,  $J$  7.0, 6.1, 1.1), 2.18 (3 H, s), 2.06 (6 H, m), 2.02 (3 H, s).

**<sup>13</sup>C NMR** (126 MHz, CDCl<sub>3</sub>): 190.6, 170.2, 170.1, 170.0, 169.3, 161.3, 131.8, 131.8, 116.7, 98.6, 71.3, 70.7, 68.4, 66.7, 61.3, 20.7, 20.6, 20.6, 20.5.

Data in accordance with literature precedent.<sup>1</sup>

## [4-(hydroxymethyl)phenyl]-2,3,4,6-tetra-*O*-acetyl- $\beta$ -D-galactopyranoside 5

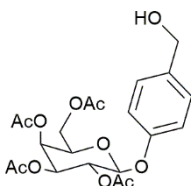

[4-(hydroxymethyl)phenyl]-2,3,4,6-tetra-*O*-acetyl- $\beta$ -D-galactopyranoside (2.30 g, 5.59 mmol, 1 eq.) was added to  $\text{CHCl}_3$  (100 mL) and *i*PrOH (40 mL) and then cooled to 0 °C. Sodium borohydride (0.423 g, 11.2 mmol, 2 eq.) was then added in one portion and the reaction allowed to warm to room temperature and stirred for 5 h, after which citric acid (100 mL, aq. 10%) was added. The organic layer was separated and the aqueous layer extracted with  $\text{CHCl}_3$  (2  $\times$  30 mL). The combined organic layers were washed with sat.  $\text{NaHCO}_3$  (30 mL), water (30 mL), brine (30 mL) then dried over  $\text{MgSO}_4$  and the solvent was removed *in vacuo*. Purification *via* silica gel column chromatography (Pet. 40–60°C 1:1 EtOAc ( $R_f$  = 0.27)) gave the title compound as a colourless oil (1.74 g, 69%). Trituration with EtOH gave the title compound as a white crystalline solid.

**Mp**; 113–116 °C (lit.<sup>1</sup> 100–112 °C).

**IR** (solid  $\text{cm}^{-1}$ ); 3558, 2924, 1732, 1520, 1371, 1213, 1061.

**$^1\text{H NMR}$**  (500 MHz,  $\text{CDCl}_3$ ); 7.33–7.29 (2 H, m), 7.02–6.98 (2 H, m), 5.49 (1 H, dd,  $J$  10.5, 8.0), 5.46 (1 H, dd,  $J$  3.4, 1.2), 5.11 (1 H, dd,  $J$  10.5, 3.4), 5.03 (1 H, d,  $J$  8.0), 4.65 (2 H, d,  $J$  5.9), 4.23 (1 H, dd,  $J$  11.4, 7.0), 4.16 (1 H, dd,  $J$  11.4, 6.4), 4.08–4.04 (1 H, m), 2.18 (3 H, s), 2.07 (3 H, s), 2.06 (3 H, s), 2.01 (3 H, s), 1.60 (1 H, t,  $J$  5.9).

**$^{13}\text{C NMR}$**  (126 MHz,  $\text{CDCl}_3$ ); 170.5, 156.7, 136.1, 128.7, 117.3, 100.0, 71.3, 71.1, 68.9, 67.1, 65.0, 61.6, 21.0, 20.9, 20.8.

Data in accordance with literature precedent.<sup>1</sup>

### Ferrocenyl azide 6

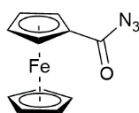

Ferrocenecarboxaldehyde (2.00 g, 8.69 mmol, 1 eq.) was suspended in anhydrous DCM (20 mL) under N<sub>2</sub> and then cooled to 0 °C. Oxalyl chloride (1.49 mL, 17.33 mmol, 2 eq.) was then added dropwise followed by a drop of DMF. The reaction was allowed to warm to room temperature and stirred for 3 h, after which the solvent was removed in vacuo. The solid residue was taken up in anhydrous DCM (20 mL) and cooled to 0 °C. TBAB (30 mg, 0.09 mmol, 0.01 eq.) was added followed by NaN<sub>3</sub> (0.85 g, 13.07 mmol, 1.5 eq.) in water (4 mL) and the reaction was left to stir for 48 h after which the reaction was diluted with water (50 mL) and the layers separated. The aqueous layer was extracted with DCM (2 x 20 mL) and the combined organic layers were dried over MgSO<sub>4</sub> and the solvent removed *in vacuo*. Purification *via* silica gel column chromatography (Pet. 40–60°C 1:1 DCM (R<sub>f</sub> = 0.45)) gave the title compound as a red-orange crystalline solid (1.98 g, 89%).

**Mp:** 85–89 °C (lit.<sup>2</sup> 84–86 °C)

**IR** (solid cm<sup>-1</sup>): 3108, 3079, 2148, 1670, 1453, 1372, 1206, 1184, 1054.

**<sup>1</sup>H NMR** (500 MHz, C<sub>6</sub>D<sub>6</sub>): 4.74 (2 H, t, *J* 2.0), 4.02 (2 H, t, *J* 2.0), 3.91 (5 H, s).

**<sup>13</sup>C NMR** (126 MHz, C<sub>6</sub>D<sub>6</sub>): 176.9, 73.3, 71.3, 71.0.

Data in accordance with literature precedent.<sup>2</sup>

#### 4-((2,3,4,6-tetraacetyl- $\beta$ -D-galactopyranosyl)oxy)benzyl (ferrocenyl)carbamate **7**

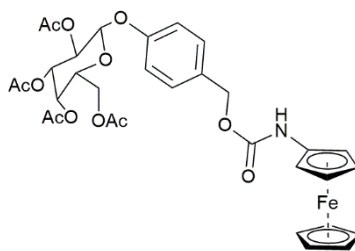

Ferrocenoyl azide (225 mg, 1 mmol, 1 eq.) was suspended in anhydrous toluene (2 mL) under argon. A solution of (per-(O)-acetyl- $\beta$ -D-galactopyranosyl)-4-oxybenzyl alcohol (454 mg, 1 mmol, 1 eq.) in anhydrous toluene (2 mL) was added and the reaction refluxed for 2 h, after which the reaction was allowed to cool to room temperature and then the solvent was removed *in vacuo*. Purification *via* silica gel column chromatography (Pet. 40–60°C 2:1 EtOAc ( $R_f$  = 0.18)) gave the title compound as an orange oil (531 mg, 78%).

**IR** (film  $\text{cm}^{-1}$ ); 3343, 2957, 1745, 1547, 1511, 1368, 1210, 1050.

**$^1\text{H NMR}$**  (500 MHz,  $\text{CDCl}_3$ ); 7.23 (2 H, d,  $J$  8.2), 6.90 (2 H, d,  $J$  8.2), 5.63 (1 H, s), 5.39 (1 H, dd,  $J$  10.5, 8.0), 5.36 (1 H, d,  $J$  3.4), 5.08–4.96 (3 H, m), 4.94 (1 H, d,  $J$  7.9), 4.62 (2 H, s), 4.26–4.02 (8 H, m), 4.00–3.92 (1 H, m), 2.09 (3 H, s), 1.96 (6 H, s), 1.92 (3 H, s).

**$^{13}\text{C NMR}$**  (126 MHz,  $\text{CDCl}_3$ ); 170.3, 170.2, 170.1, 169.3, 156.9, 131.2, 129.9, 117.0, 99.6, 71.1, 70.8, 69.6, 68.6, 66.8, 66.4, 64.8, 61.3, 60.7, 20.7, 20.7, 20.6, 20.6.

**HRMS** (ESI); calc'd for  $\text{C}_{32}\text{H}_{35}\text{FeNO}_{12}$   $[\text{M}]^+$ :  $m/z$  681.150, found 681.157.

#### 4-((β-D-galactopyranosyl)oxy)benzyl (ferrocenyl)carbamate 1

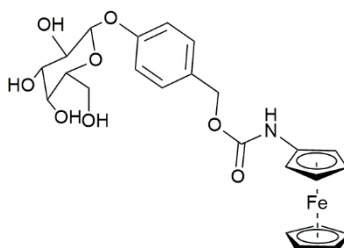

4-((2,3,4,6-tetraacetyl-β-D-galactopyranosyl)oxy)benzyl (ferrocenyl)carbamate (531 mg, 0.78 mmol, 1 eq.) was suspended in MeOH (10 mL). Sodium methoxide (210 mg, 3.9 mmol, 5 eq.) in one portion and the reaction was stirred for 20 min, after which the reaction mixture was filtered. The filtrate was concentrated to give the title compound as an orange oil. Trituration with DCM gave the title compound as an orange crystalline solid. (0.239 g, 60 %).

**Mp:** 140-145 °C

**IR** (solid cm<sup>-1</sup>): 3285, 2996, 1770.

**<sup>1</sup>H NMR** (500 MHz, CD<sub>3</sub>OD); 7.34 (2 H, d, *J* 8.2), 7.11 (2 H, d, *J* 8.2), 5.07 (2 H, s), 4.87 (1 H, d, *J* 7.9), 4.46 (2 H, s), 4.09 (5 H, s), 3.92 (2 H, s), 3.90 (1 H, dd, *J* 3.4, 1.0), 3.79 (1 H, dd, *J* 9.7, 7.9), 3.77–3.71 (2 H, m), 3.68 (1 H, ddd, *J* 6.8, 5.3, 1.1), 3.57 (1 H, dd, *J* 9.7, 3.4).

**<sup>13</sup>C NMR** (126 MHz, CD<sub>3</sub>OD); 170.32, 130.51, 117.78, 102.89, 76.96, 74.86, 72.28, 70.22, 69.96, 67.18, 65.03, 62.40, 61.55.

**HRMS** (ESI); calc'd for C<sub>24</sub>H<sub>27</sub>FeNO<sub>8</sub> [M]<sup>+</sup>: *m/z* 513.109, found 513.114.

### Aminoferrocene 3

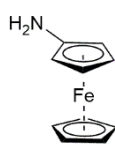

Synthesised according to a literature procedure.<sup>3</sup>

**Mp:** 149-152 °C (lit.<sup>3</sup> 151-153 °C)

**<sup>1</sup>H NMR** (500 MHz, CDCl<sub>3</sub>); 4.11 (5 H, s), 4.01 (2 H, s), 3.86 (2 H, s), 2.56 (2 H, brs).

**<sup>13</sup>C NMR** (126 MHz, CDCl<sub>3</sub>); 68.9, 63.4, 58.7.



## Synthesis of Substrate 11

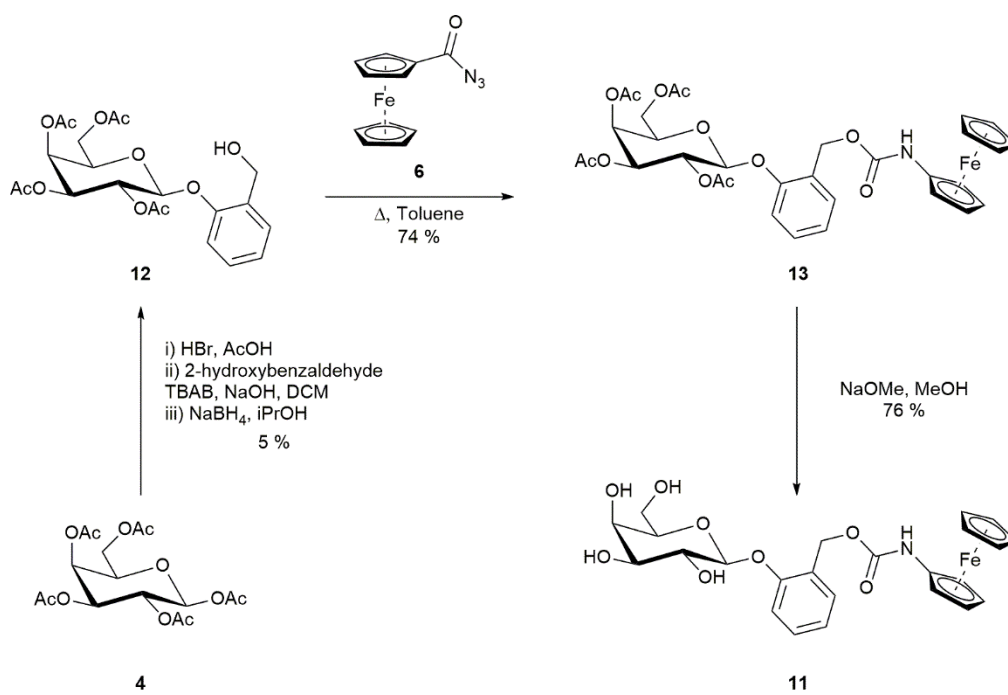

### Per-(O)-acetyl- $\beta$ -D-galactopyranosyl)-2-oxybenzaldehyde

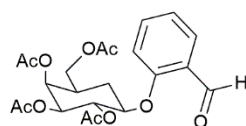

$\beta$ -D-galactopyranose pentaacetate (780 mg, 2 mmol, 1 eq.) was suspended in HBr (45 % in AcOH, 2 mL) and acetic acid (1 mL) was added. The reaction was stirred for 2 h after which DCM (10 mL) and ice (10 g) were added. The organic layer was separated and the aqueous later was extracted with DCM (2 x 10 mL). The combined organic layers were washed with water (3 x 10 mL), sat. NaHCO<sub>3</sub> (10 mL), brine (10 mL), then dried over MgSO<sub>4</sub> and the solvent was removed *in vacuo*. Purification *via* silica gel column chromatography (DCM 19:1 MeOH (R<sub>f</sub> = 0.68)) gave the brominated intermediate as a pale yellow oil.

A solution of the intermediate in DCM (4 mL) was added dropwise to a solution of 2-hydroxybenzaldehyde (0.17 mL, 1.6 mmol, 0.8 eq.) and tetra-n-butylammonium bromide (516 mg, 1.6 mmol, 0.8 eq.) in NaOH (1 m, 4 mL) and the reaction was refluxed for 20 h, after which the reaction was cooled to room temperature. DCM (10 mL) and water (10 mL) were added. The organic layer was separated and aqueous layer extracted with DCM (2 x 20 mL). The combined organic layers were washed with HCl (1 m, 10 mL), water (10 mL), NaOH (1 m, 10 mL), brine (20 mL), then dried over MgSO<sub>4</sub> and the solvent was removed *in vacuo*. Purification *via* silica gel column chromatography (Pet. 40-60 °C 2:1 EtOAc) gave the title compound as a colourless oil (325 mg, 26 %).

<sup>1</sup>H NMR (500 MHz, CDCl<sub>3</sub>); 10.36 (1 H, s), 7.86 (1 H, dd, *J* 7.5, 1.8), 7.56 (1 H, ddd, *J* 8.3, 7.5, 1.8), 7.18 (1 H, td, *J* 7.5, 1.0), 7.12 (1 H, dd, *J* 8.3, 1.0), 5.59 (1 H, dd, *J* 10.5, 7.9), 5.48 (1 H, dd, *J* 3.4, 1.1), 5.16 – 5.12 (2 H, m), 4.24 (1 H, dd, *J* 11.2, 6.9), 4.16 (1 H, dd, *J* 11.2, 6.2), 4.13 – 4.08 (1 H, m), 2.20 (3 H, s), 2.06 (6 H, s), 2.02 (3 H, s).

<sup>13</sup>C NMR (126 MHz, CDCl<sub>3</sub>); 189.2, 170.3, 170.1, 170.0, 169.3, 158.8, 135.6, 128.3, 126.2, 123.5, 115.8, 99.5, 71.3, 70.6, 68.4, 66.7, 61.2, 20.6, 20.6, 20.6, 20.5.

**[2-(hydroxymethyl)phenyl]-2,3,4,6-tetra-O-acetyl- $\beta$ -D-galactopyranoside 12**

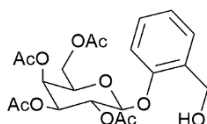

[2-(hydroxymethyl)phenyl]-2,3,4,6-tetra-*O*-acetyl- $\beta$ -D-galactopyranoside (289 mg, 0.64 mmol, 1 eq.) was suspended in *i*PrOH (20 mL) and heated to 50 °C and then cooled to room temperature. Sodium borohydride (24 mg, 0.64 mmol, 1 eq.) was then added in one portion and the reaction stirred for 3 h, after which the reaction mixture was poured onto ice/water (10 mL) and pH adjusted to 6.5. The reaction mixture was extracted with CHCl<sub>3</sub> (3 × 10 mL) and the combined organic layers were washed with water (2 × 20 mL), brine (10 mL) then dried over MgSO<sub>4</sub> and the solvent was removed *in vacuo*. Purification *via* silica gel column chromatography (Pet. 40–60 °C 1:1 EtOAc) gave the title compound as a colourless oil (92 mg, 21 %).

<sup>1</sup>H NMR (500 MHz, CDCl<sub>3</sub>); 7.33 (1 H, dd, *J* 7.4, 1.7), 7.30 – 7.25 (1 H, m), 7.08 (1 H, td, *J* 7.5, 1.0), 7.02 (1 H, dd, *J* 8.2, 1.0), 5.52 (1 H, dd, *J* 10.5, 7.9), 5.47 (1 H, dd, *J* 3.5, 1.1), 5.14 (1 H, dd, *J* 10.5, 3.5), 5.08 (1 H, d, *J* 7.9), 4.68 – 4.56 (2 H, m), 4.22 (1 H, dd, *J* 11.4, 7.2), 4.16 (1 H, dd, *J* 11.4, 6.0), 4.07 (1 H, ddd, *J* 7.2, 6.0, 1.1), 2.20 (3 H, s), 2.11 (3 H, s), 2.05 (3 H, s), 2.02 (3 H, s).

<sup>13</sup>C NMR (126 MHz, CDCl<sub>3</sub>); 170.3, 170.2, 170.0, 169.9, 154.8, 131.1, 129.6, 129.1, 123.6, 115.2, 99.8, 71.1, 70.6, 68.7, 66.8, 61.3, 61.2, 20.8, 20.6, 20.6, 20.5.

## 2-((2,3,4,6-tetraacetyl- $\beta$ -D-galactopyranosyl)oxy)benzyl (ferrocenyl)carbamate 13

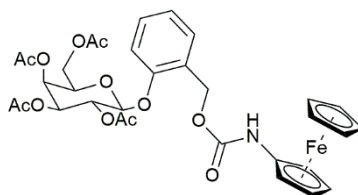

Ferrocenoyl azide (45 mg, 0.2 mmol, 1 eq.) was suspended in anhydrous toluene (0.5 mL) under argon. A solution of (per-(O)-acetyl- $\beta$ -D-galactopyranosyl-2-oxybenzyl alcohol (92 mg, 0.2 mmol, 1 eq.) in anhydrous toluene (0.5 mL) was added and the reaction refluxed for 2 h, after which the reaction was allowed to cool to room temperature and then the solvent was removed *in vacuo*. Purification *via* silica gel column chromatography (Pet. 40–60 °C 2:1 EtOAc) gave the title compound as an orange oil (101 mg, 74%).

**IR** (film  $\text{cm}^{-1}$ ); 3323, 2881, 1678, 1552, 1416.

**$^1\text{H NMR}$**  (500 MHz,  $\text{CDCl}_3$ ); 7.37 – 7.31 (1 H, m), 7.31 – 7.26 (1 H, m), 7.12 – 7.06 (2 H, m), 5.63 (2 H, brs), 5.53 (1 H, dd,  $J$  10.3, 7.7), 5.46 (1 H, s), 5.20 (1 H, d,  $J$  12.8), 5.15 – 5.01 (5 H, m), 4.41 (5 H, s), 4.25 (1 H, dd,  $J$  11.4, 6.7), 4.16 (1 H, dd,  $J$  11.4, 5.9), 4.06 (1 H, d,  $J$  6.5), 2.19 (3 H, s), 2.11 (3 H, s), 2.06 (3 H, s), 2.02 (3 H, s).

**$^{13}\text{C NMR}$**  (126 MHz,  $\text{CDCl}_3$ ); 170.4, 170.2, 170.1, 169.5, 154.6, 129.5 – 129.3 (m), 126.5, 123.5, 115.7, 99.9, 71.1, 70.7, 68.6, 66.8, 61.4, 20.8, 20.7, 20.6, 20.6.

**HRMS** (ESI); calc'd for  $\text{C}_{32}\text{H}_{36}\text{FeNO}_{12}$   $[\text{M}+\text{H}]^+$ :  $m/z$  682.158, found 682.166.

## 2-(( $\beta$ -D-galactopyranosyl)oxy)benzyl (ferrocenyl)carbamate **11**

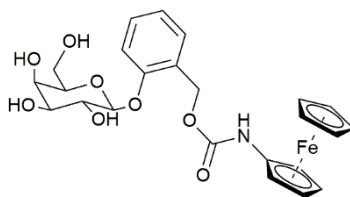

2-((2,3,4,6-tetraacetyl- $\beta$ -D-galactopyranosyl)oxy)benzyl (ferrocenyl)carbamate (87 mg, 0.13 mmol, 1 eq.) was suspended in MeOH (1 mL). Sodium methoxide (3 mg, 0.64 mmol, 5 eq.) in one portion and the reaction was stirred for 1 h, after which the reaction mixture was filtered. The filtrate was concentrated to give an orange oil. Purification *via* silica gel column chromatography (DCM 9:1 MeOH ( $R_f$  = 0.38)) gave the title compound as an orange solid (50 mg, 76%).

**Mp:** 160-163 °C

**IR** (solid  $\text{cm}^{-1}$ ): 3568, 3287, 2879, 1679, 1608, 1552, 1499.

**$^1\text{H NMR}$**  (500 MHz,  $\text{CD}_3\text{OD}$ ): 7.38 (1 H, d,  $J$  7.6), 7.31 – 7.23 (2 H, m), 7.04 (1 H, t,  $J$  7.4), 5.35 – 5.25 (2 H, m), 4.87 (1 H, d,  $J$  7.8), 4.48 (2 H, s), 4.10 (5 H, s), 3.93 (2 H, t,  $J$  2.0), 3.91 (1 H, dd,  $J$  3.4, 1.0), 3.86 (1 H, dd,  $J$  9.7, 7.8), 3.78 (2 H, qd,  $J$  11.4, 6.0), 3.69 (1 H, ddd,  $J$  6.8, 5.2, 1.0), 3.59 (1 H, dd,  $J$  9.7, 3.4).

**$^{13}\text{C NMR}$**  (126 MHz,  $\text{CD}_3\text{OD}$ ) 156.9, 130.4, 129.9, 127.8, 123.4, 116.8, 103.7, 77.1, 74.9, 72.4, 70.2, 70.0, 65.1, 62.8, 62.5, 61.6.

**HRMS** (ESI); calc'd for  $\text{C}_{24}\text{H}_{27}\text{FeNO}_8$   $[\text{M}]^+$ :  $m/z$  513.109, found 513.112.

### Stability of Substrate 1 in Solution

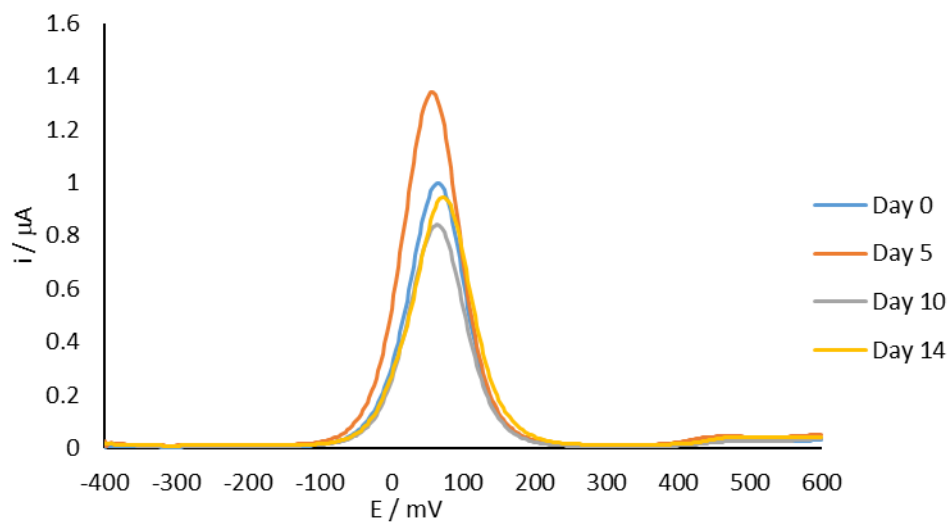

Figure S1 – Differential pulse voltammogram obtained of substrate 1 (1 mM) after X days.

### Initial $\beta$ -Galactosidase Concentration

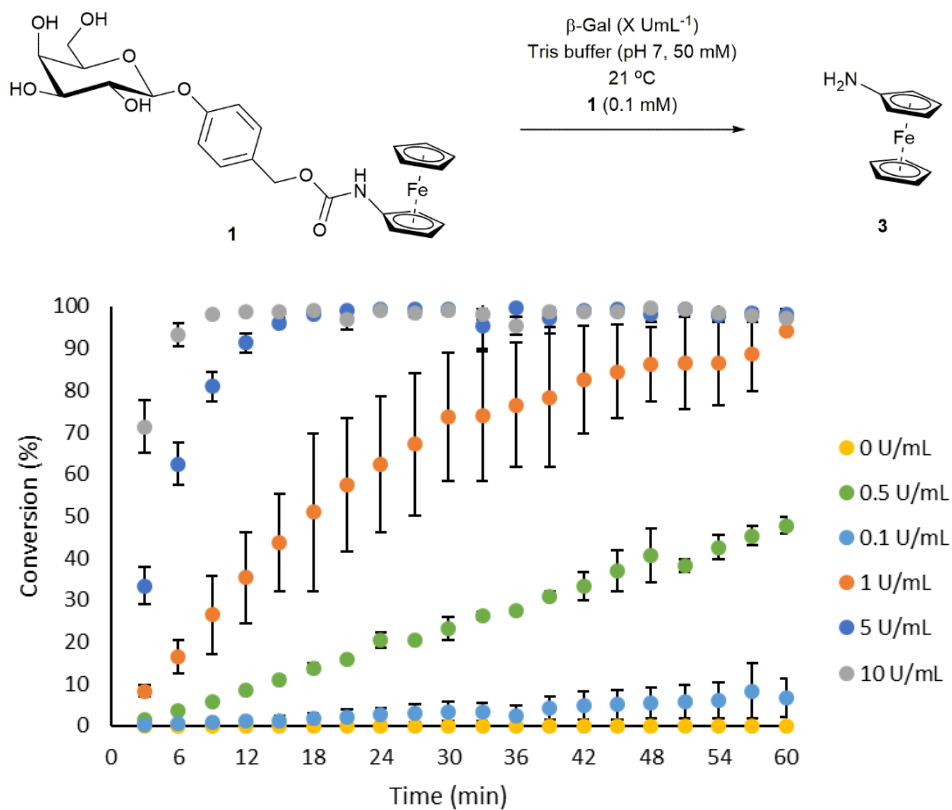

Figure S2 - Conversion of the substrate 1 (0.1 mM) to the product after addition of  $\beta$ -Gal ( $X \text{ U mL}^{-1}$ ) at room temperature in tris buffer (pH 7, 50 mM). Error bars represent the standard deviation where  $n = 3$ .

### Presence of 4-hydroxybenzyl alcohol

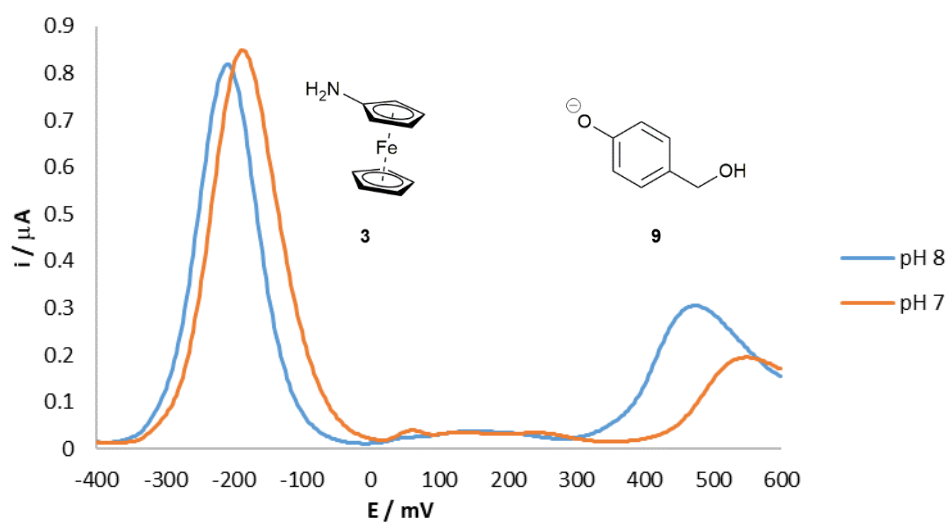

Figure S3 - Differential pulse voltammogram obtained of substrate **1** (1 mM) after addition of  $\beta$ -Gal (1 U mL<sup>-1</sup>) at room temperature in tris buffer (pH X, 50 mM) after 45 minutes.

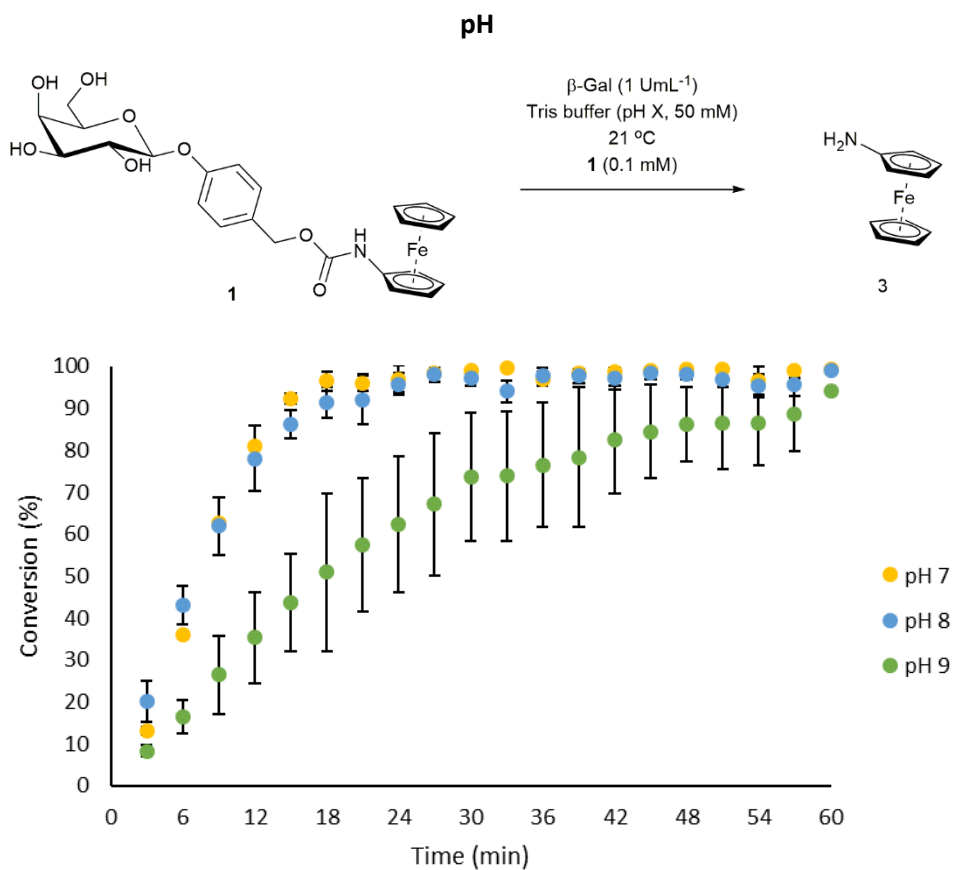

Figure S4 - Conversion of the substrate **1** (0.1 mM) to the product after addition of  $\beta$ -Gal (1 U mL<sup>-1</sup>) at room temperature in tris buffer (pH X, 50 mM). Error bars represent the standard deviation where n = 3.

### Temperature

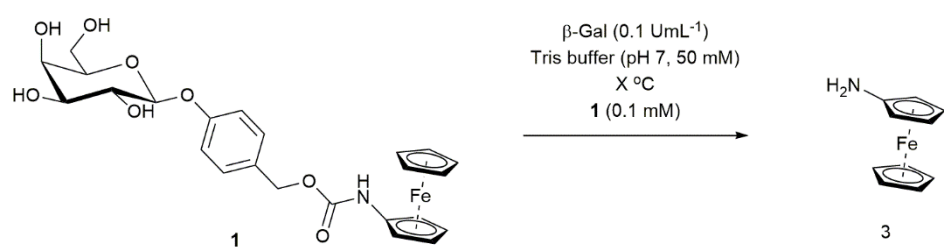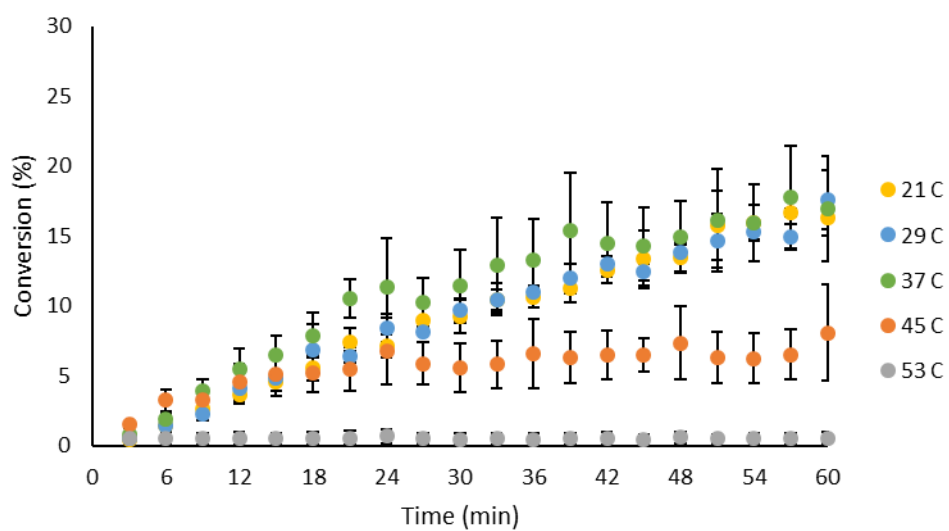

Figure S5 - Conversion of the substrate 1 ( $0.1 \text{ mM}$ ) to the product after addition of  $\beta$ -Gal ( $0.1 \text{ U mL}^{-1}$ ) at varying temperatures ( $X \text{ }^\circ\text{C}$ ) in tris buffer (pH 7, 50 mM). Error bars represent the standard deviation where  $n = 3$ .



### Buffer Concentration

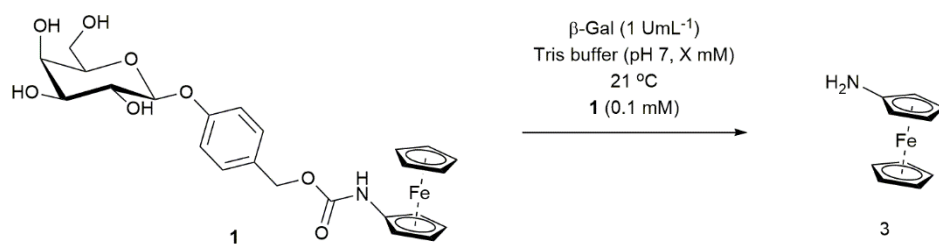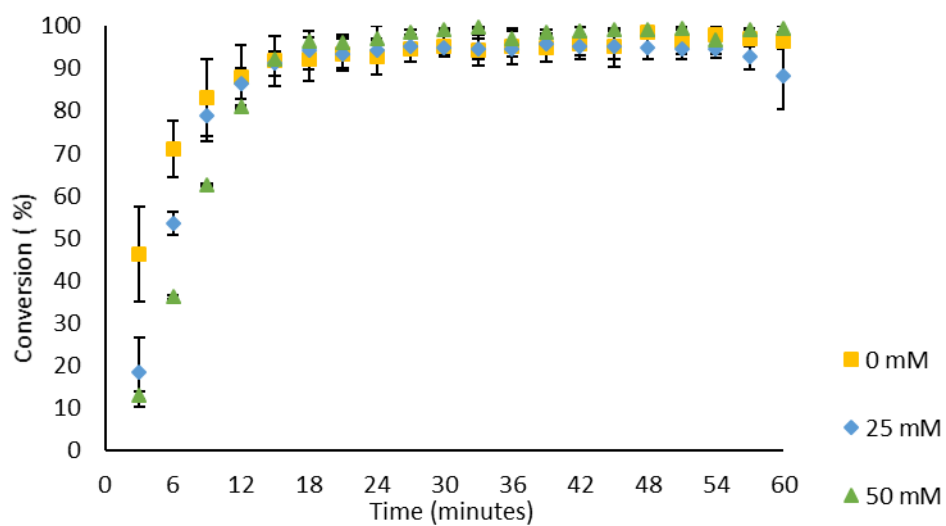

Figure S6 - Conversion of the substrate 1 (0.1 mM) to the product after addition of  $\beta$ -Gal (1 U mL<sup>-1</sup>) at room temperatures (21 °C) in vary concentrations of tris buffer (pH 7, X mM). Error bars represent the standard deviation where n = 3.

### Kinetic Linear Transformation of Substrate 1

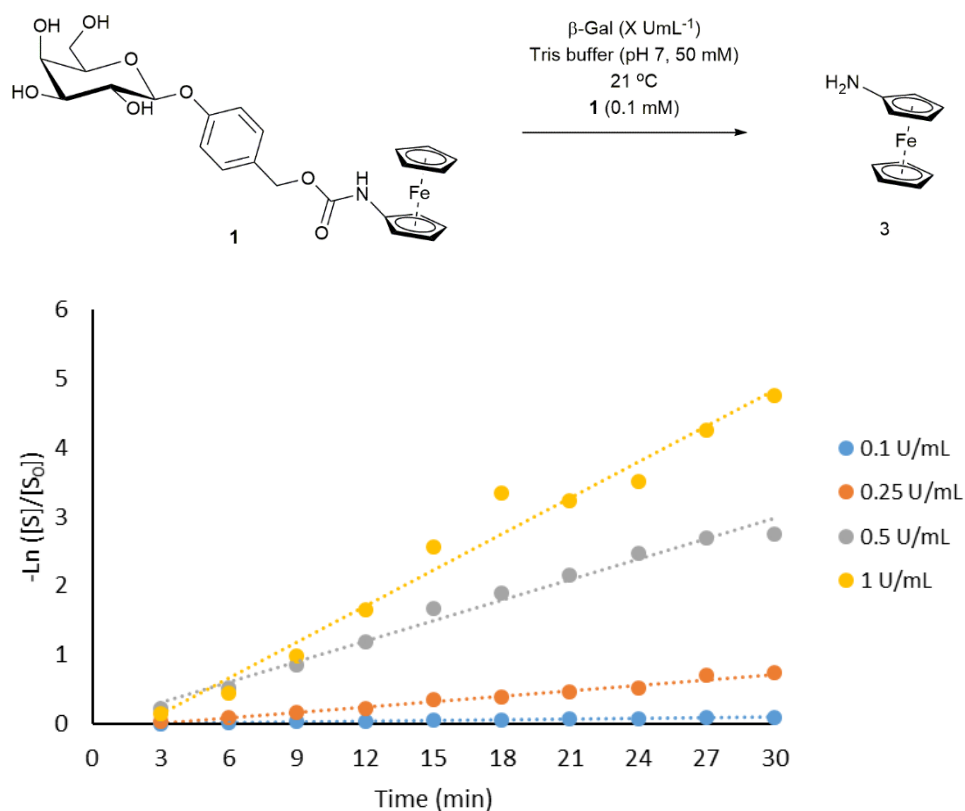

Figure S7 – Kinetic linear transformation curves of substrate 1 (0.1 mM) at increasing concentration of  $\beta$ -Gal ( $X \text{ U mL}^{-1}$ ) at room temperature (21 °C) in tris buffer (pH 7, 50 mM).

#### Kinetic calculations

Pseudo-first order equation  $y = kx + C$  where: for  $1 \text{ U mL}^{-1}$   $k = 0.1744 \text{ min}^{-1}$  ( $2.91 \times 10^{-3} \text{ s}^{-1}$ ),  $C = -0.3883$ ; for  $0.5 \text{ U mL}^{-1}$   $k = 0.0996 \text{ min}^{-1}$  ( $1.66 \times 10^{-3} \text{ s}^{-1}$ ),  $C = -0.0009$ ; for  $0.25 \text{ U mL}^{-1}$   $k = 0.0264 \text{ min}^{-1}$  ( $0.44 \times 10^{-3} \text{ s}^{-1}$ ),  $C = -0.0692$ ; for  $0.1 \text{ U mL}^{-1}$   $k = 0.0036 \text{ min}^{-1}$  ( $0.06 \times 10^{-3} \text{ s}^{-1}$ ),  $C = -0.0056$ .

### Reactivity of Substrate 11

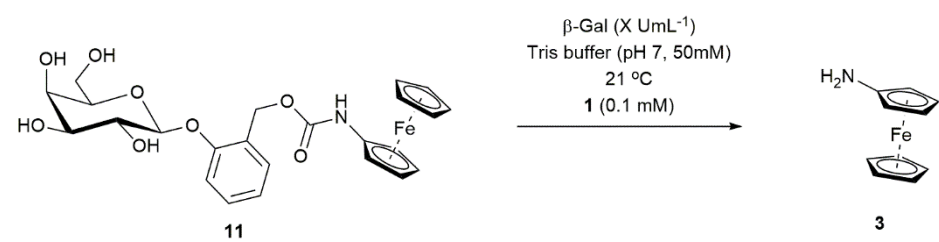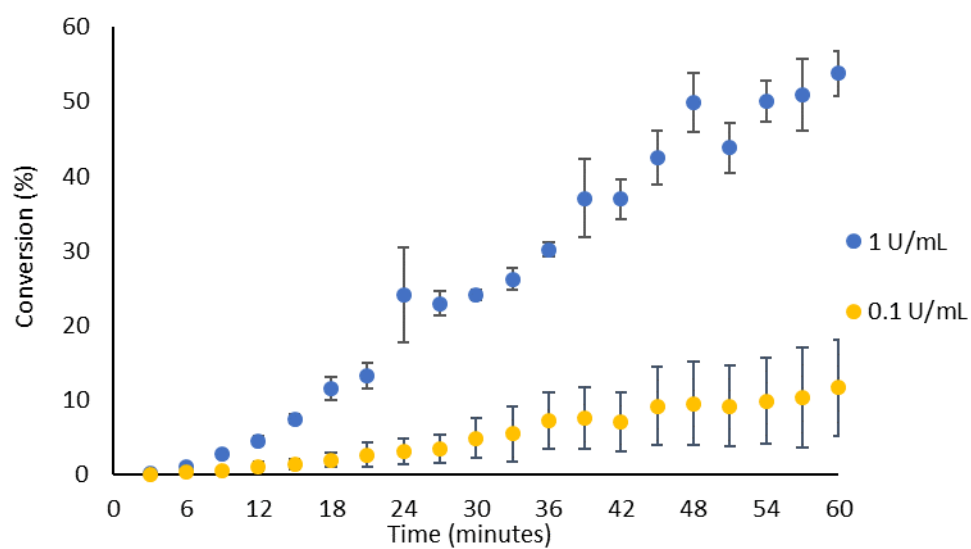

Figure S8 - Conversion of the substrate **11** (0.1 mM) to the product after addition of varying concentrations of  $\beta$ -Gal (X U mL<sup>-1</sup>) at room temperatures (21 °C) in tris buffer (pH 7, 50 mM). Error bars represent the standard deviation where n = 3.

### Kinetic Linear Transformation of Substrate 11

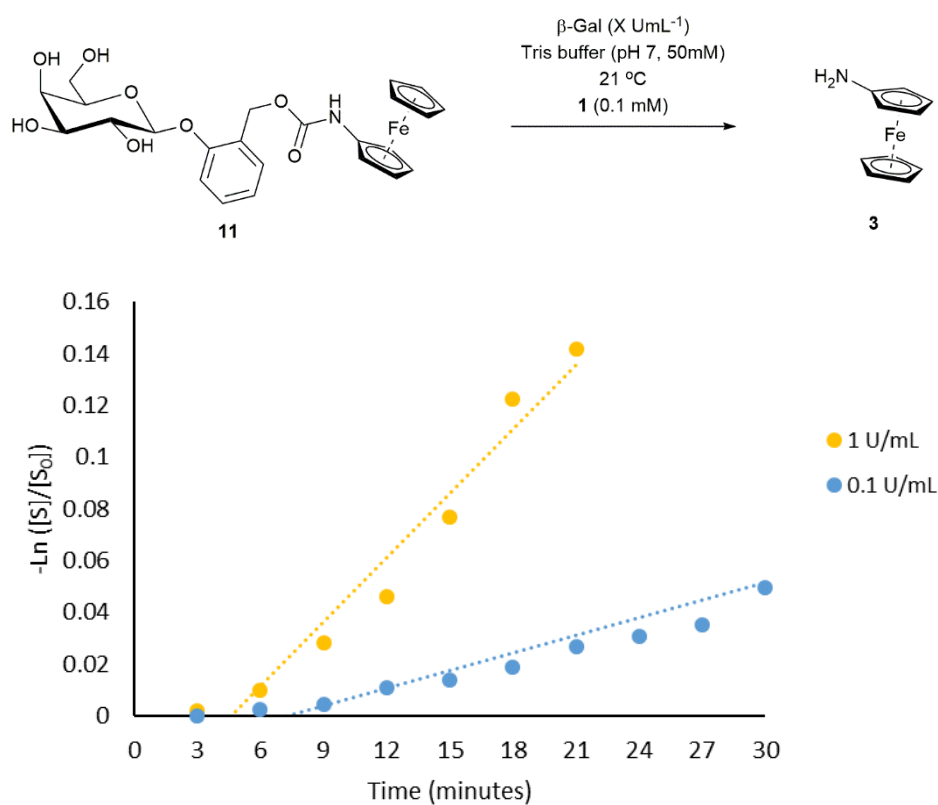

Figure S9 – Kinetic linear transformation curves of substrate **11** (0.1 mM) at increasing concentration of  $\beta$ -Gal (X U mL<sup>-1</sup>) at room temperature (21 °C) in Tris buffer (pH 7, 50 mM).

#### Kinetic calculations

Pseudo-first order equation  $y = kx + C$  where: for 1 U mL<sup>-1</sup>  $k = 0.0083 \text{ min}^{-1}$  ( $0.14 \times 10^{-3} \text{ s}^{-1}$ ),  $C = -0.0382$ ; for 0.1 U mL<sup>-1</sup>  $k = 0.0023 \text{ min}^{-1}$  ( $0.04 \times 10^{-3} \text{ s}^{-1}$ ),  $C = -0.0165$ .

### **Method for the electrochemical detection of $\beta$ -Galactosidase (optimised conditions)**

A 10 mM stock solution of substrate **1** (5 mg) was prepared in DMSO (1 mL). A 100  $\mu$ M stock solution of substrate **1** (10  $\mu$ L) was prepared using 50 mM pH 7 tris buffer (990  $\mu$ L). To 800  $\mu$ L of buffer (50 mM pH 7 tris buffer) in a small screw top vial equipped with a small magnetic stirrer was added 100  $\mu$ L of the stock solution of **1** then 100  $\mu$ L buffered (50 mM pH 7 tris buffer) solution of  $\beta$ -galactosidase. Every 3 minutes for 60 minutes thereafter, a 10  $\mu$ L sample was subjected to electrochemical analysis.

## References

- 1 T. Chauvin, P. Durand, M. Bernier, H. Meudal, T-B. Doan, F. Noury, B. Badet, J-C. Beloeil and E. Tóth, *Angew. Chemie. Int. Ed.*, 2008, **47**, 4370.
- 2 D. C. D. Butler and C. J. Richards, *Organometallics*, 2002, **21**, 5433.
- 3 S. Goggins, E. A. Apsey, M. F. Mahon and C. G. Frost, *Org. Biomol. Chem.*, 2017, **15**, 2459.

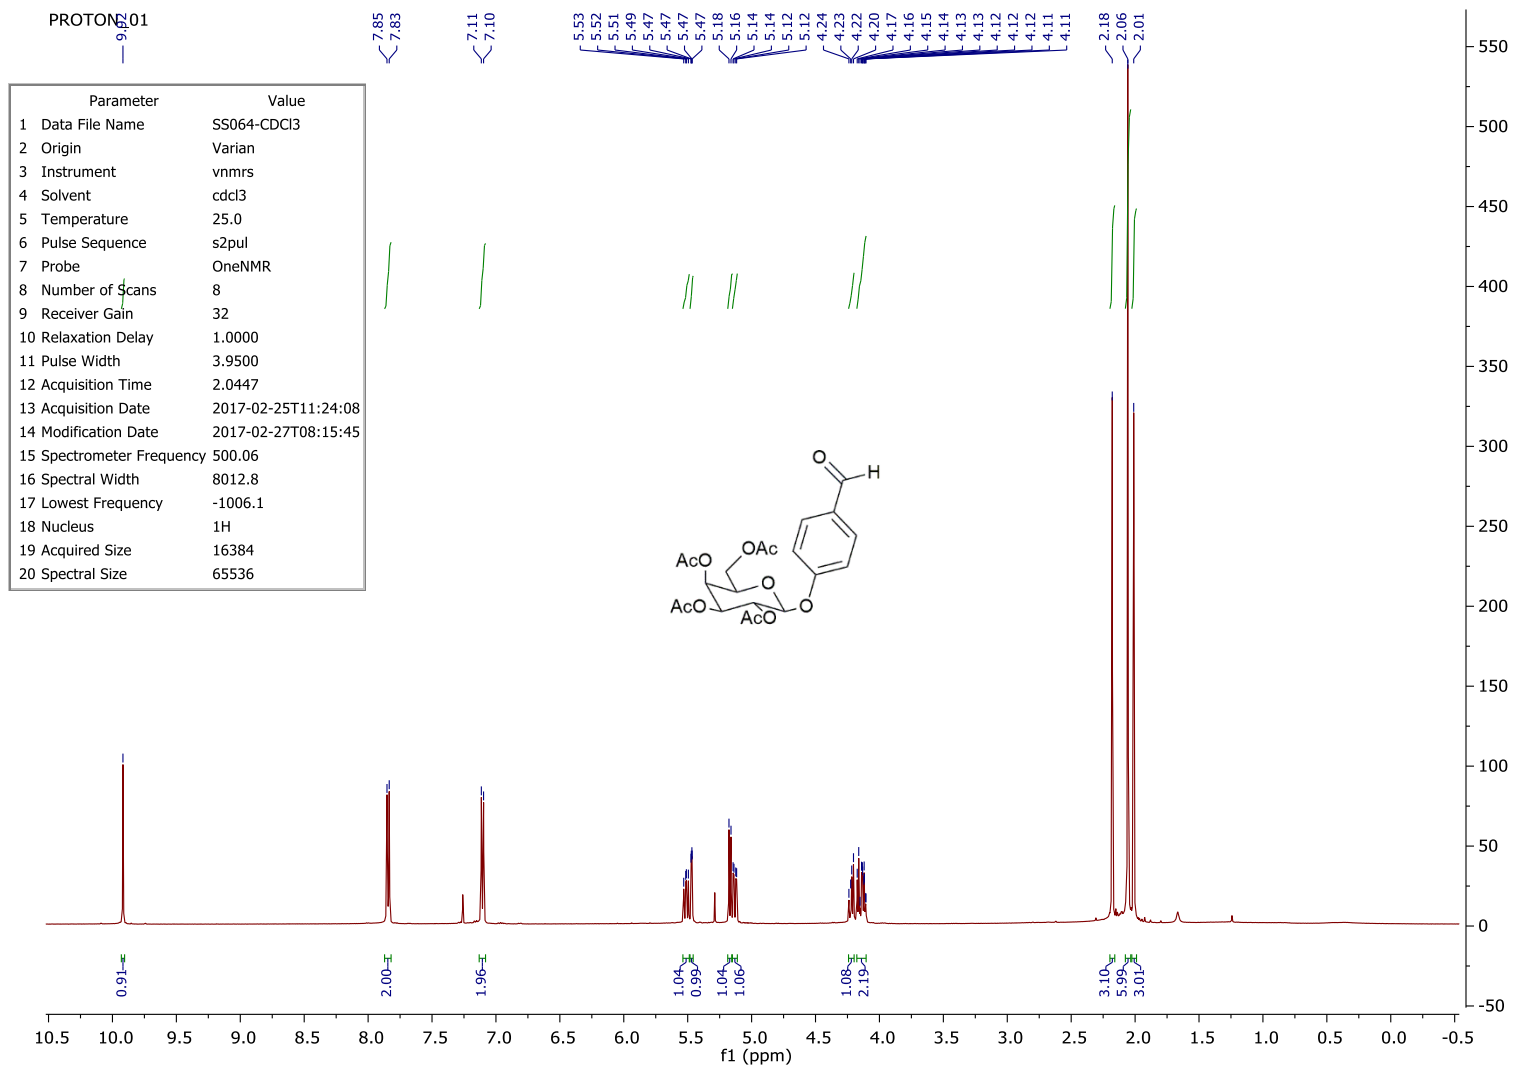

CARBON\_01

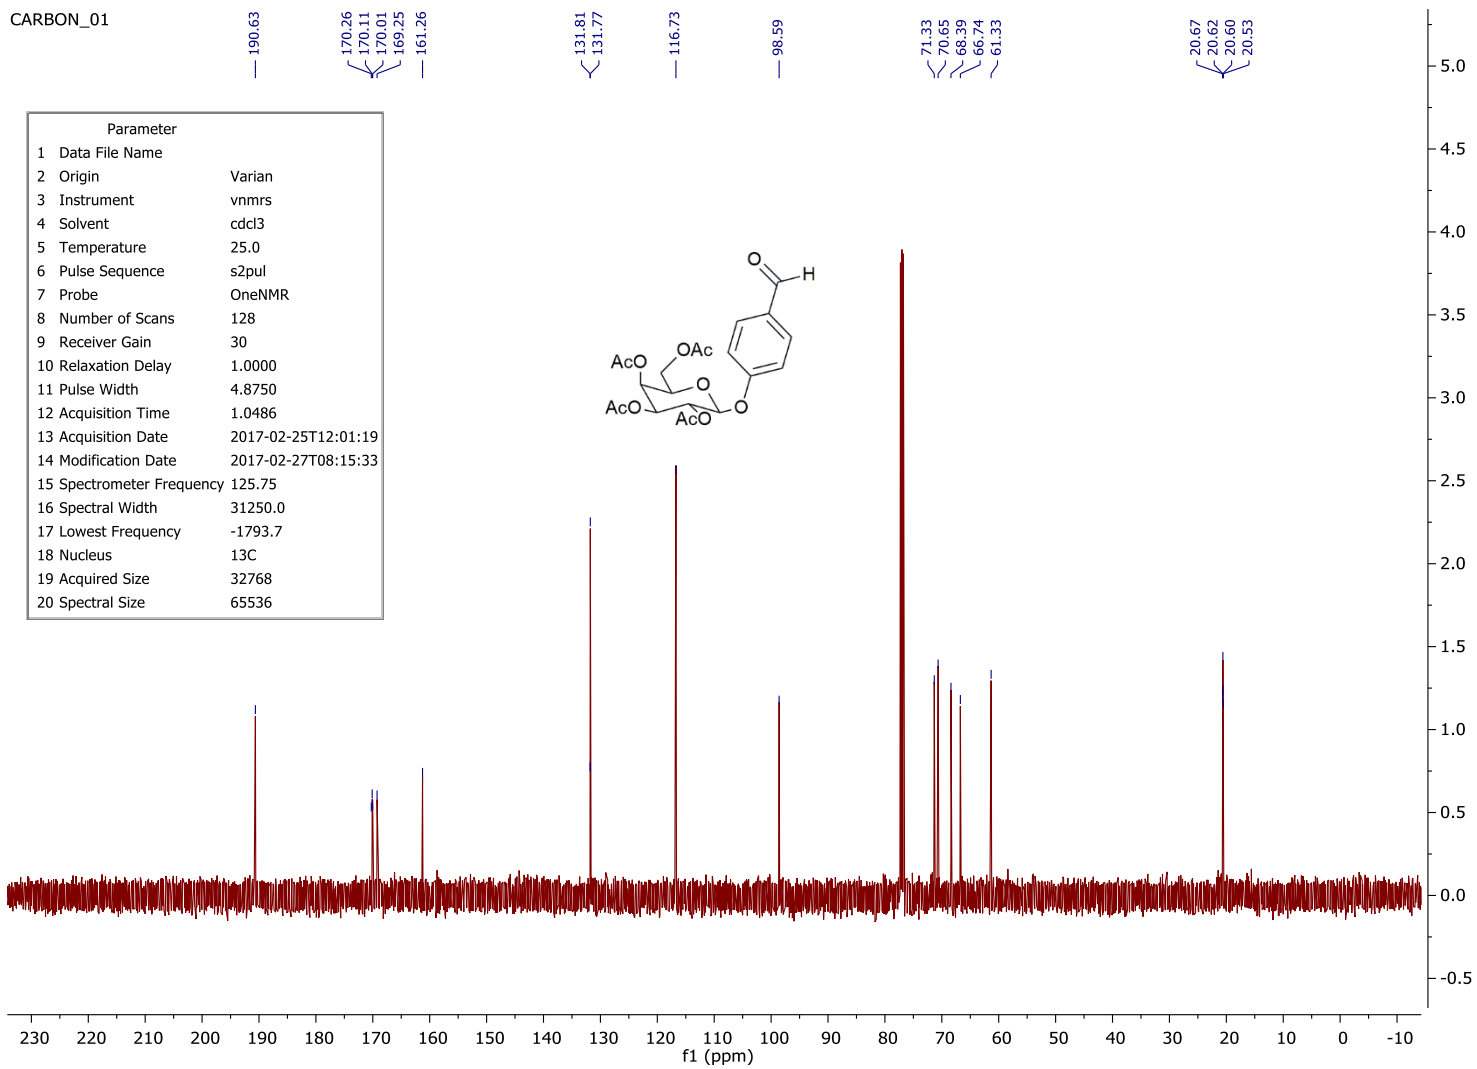



PROTON\_01

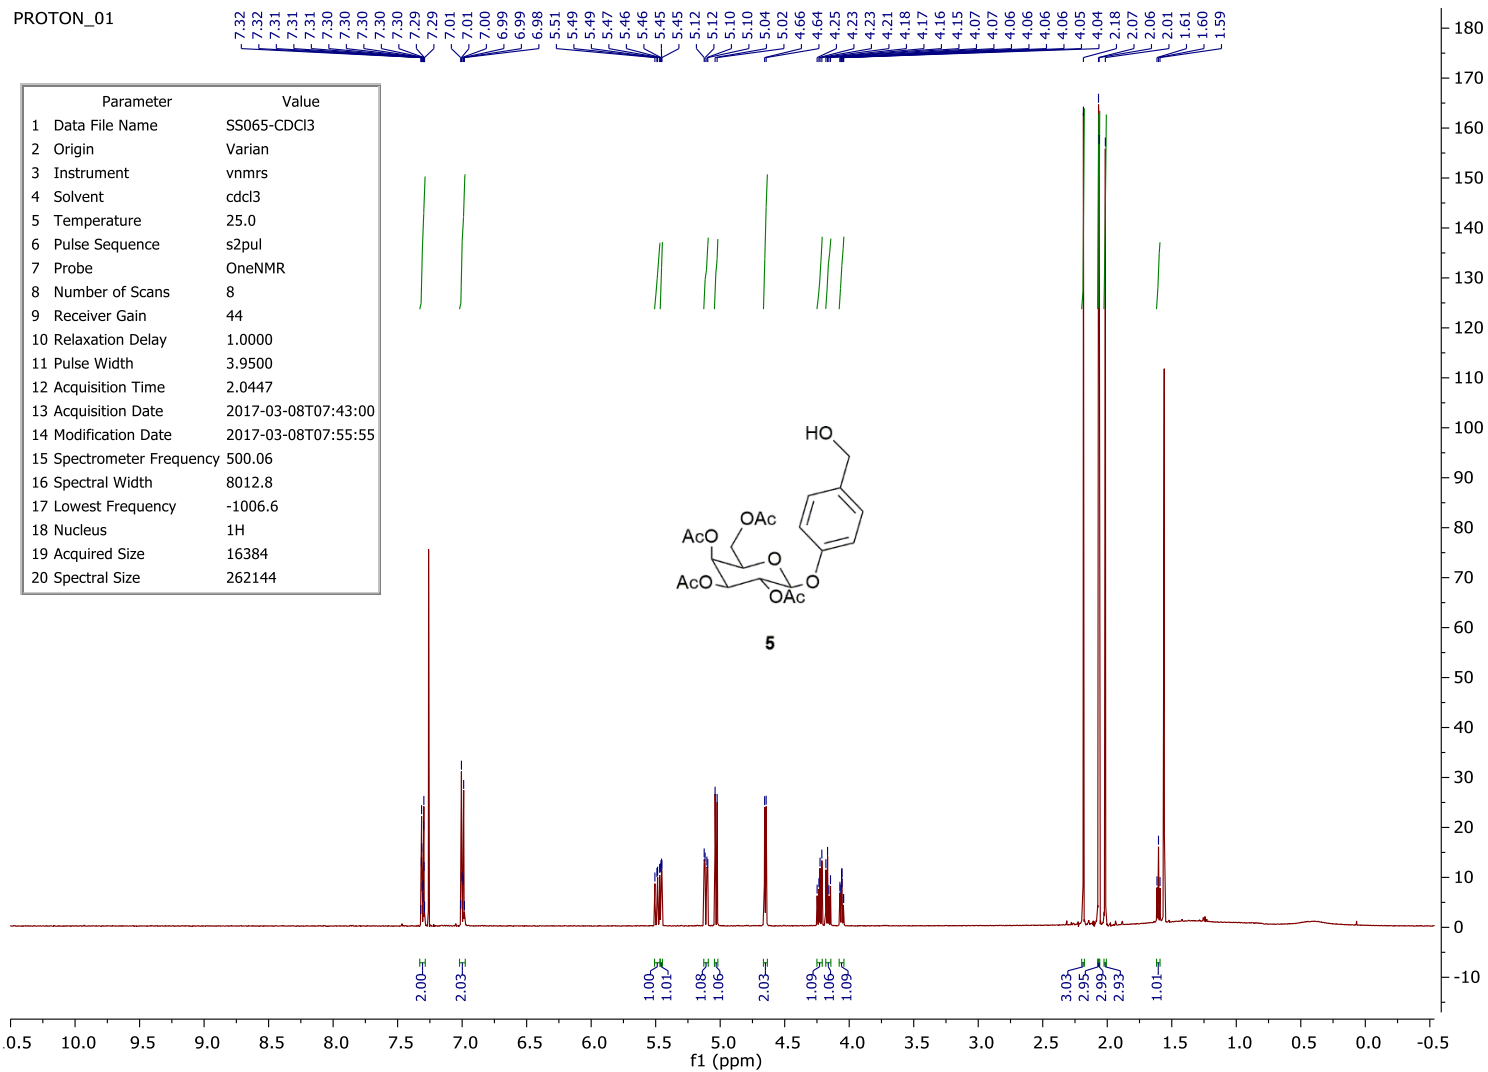

CARBON\_01

| Parameter                 | Value               |
|---------------------------|---------------------|
| 1 Data File Name          | SS065-CDCI3         |
| 2 Origin                  | Varian              |
| 3 Instrument              | vnms                |
| 4 Solvent                 | cdcl3               |
| 5 Temperature             | 25.0                |
| 6 Pulse Sequence          | s2pul               |
| 7 Probe                   | OneNMR              |
| 8 Number of Scans         | 128                 |
| 9 Receiver Gain           | 30                  |
| 10 Relaxation Delay       | 1.0000              |
| 11 Pulse Width            | 4.8750              |
| 12 Acquisition Time       | 1.0486              |
| 13 Acquisition Date       | 2017-03-08T08:36:27 |
| 14 Modification Date      | 2017-03-08T09:55:24 |
| 15 Spectrometer Frequency | 125.75              |
| 16 Spectral Width         | 31250.0             |
| 17 Lowest Frequency       | -1762.8             |
| 18 Nucleus                | 13C                 |
| 19 Acquired Size          | 32768               |
| 20 Spectral Size          | 65536               |

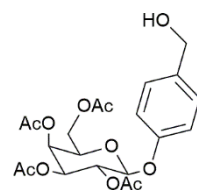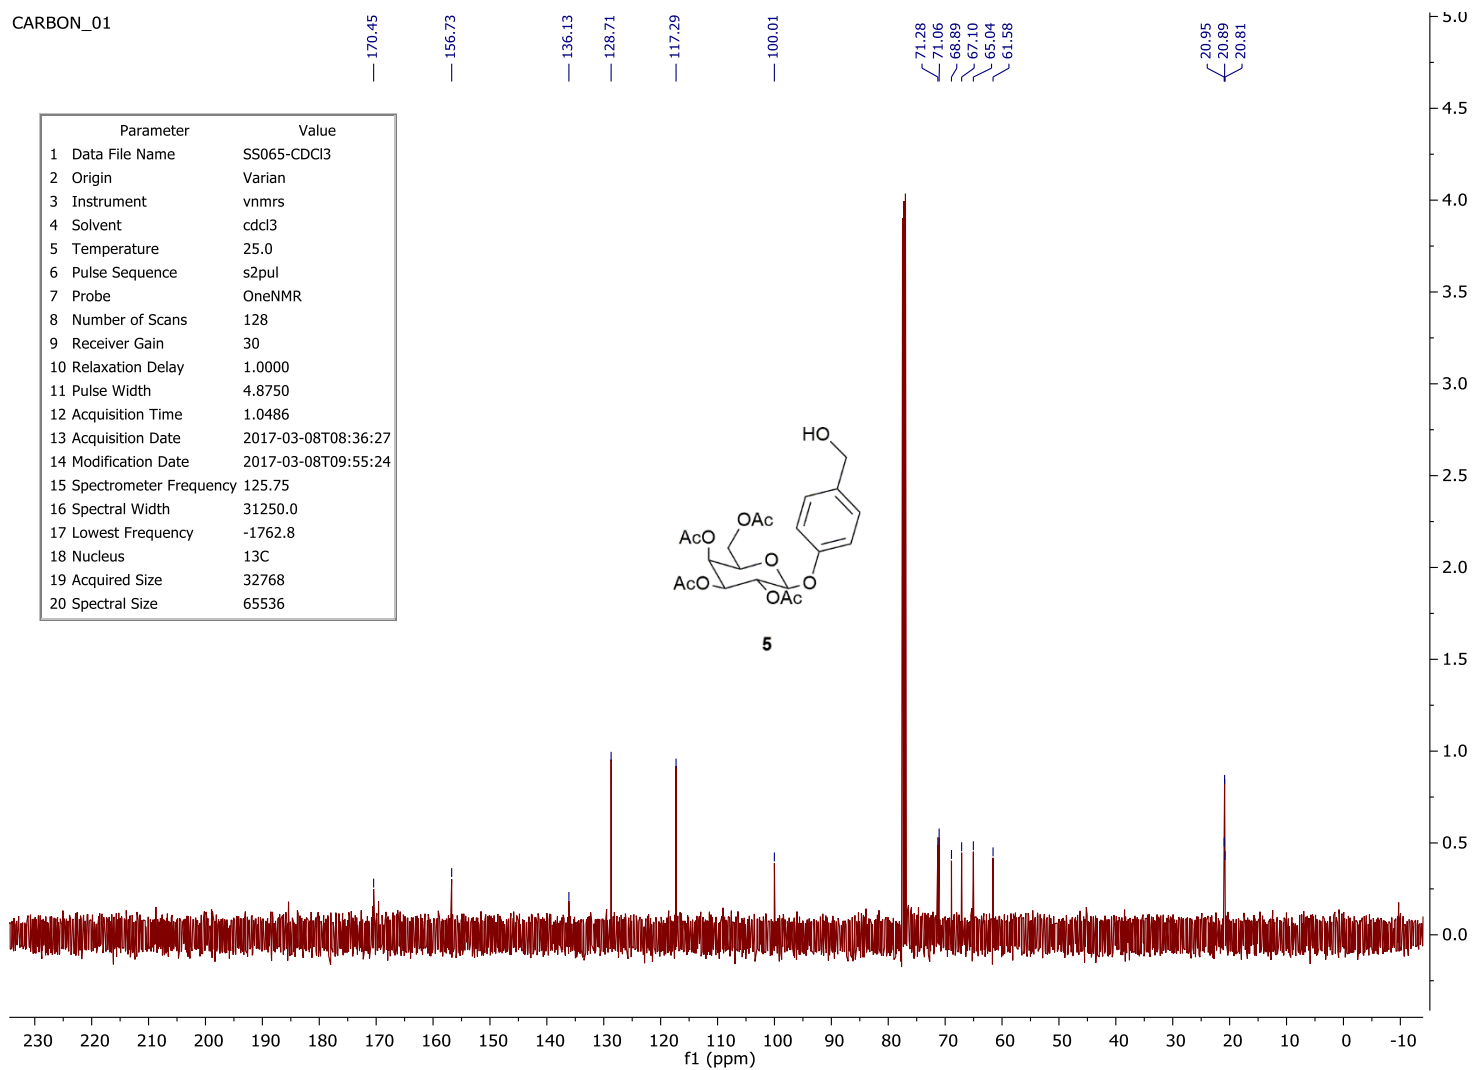

PROTON\_01

| Parameter                 | Value               |
|---------------------------|---------------------|
| 1 Data File Name          | SS100-C6D6          |
| 2 Origin                  | Varian              |
| 3 Instrument              | vnmrs               |
| 4 Solvent                 | c6d6                |
| 5 Temperature             | 25.0                |
| 6 Pulse Sequence          | s2pul               |
| 7 Probe                   | OneNMR              |
| 8 Number of Scans         | 8                   |
| 9 Receiver Gain           | 36                  |
| 10 Relaxation Delay       | 1.0000              |
| 11 Pulse Width            | 3.9500              |
| 12 Acquisition Time       | 2.0447              |
| 13 Acquisition Date       | 2017-06-15T10:42:01 |
| 14 Modification Date      | 2017-06-15T11:53:47 |
| 15 Spectrometer Frequency | 500.06              |
| 16 Spectral Width         | 8012.8              |
| 17 Lowest Frequency       | -1024.1             |
| 18 Nucleus                | 1H                  |
| 19 Acquired Size          | 16384               |
| 20 Spectral Size          | 65536               |

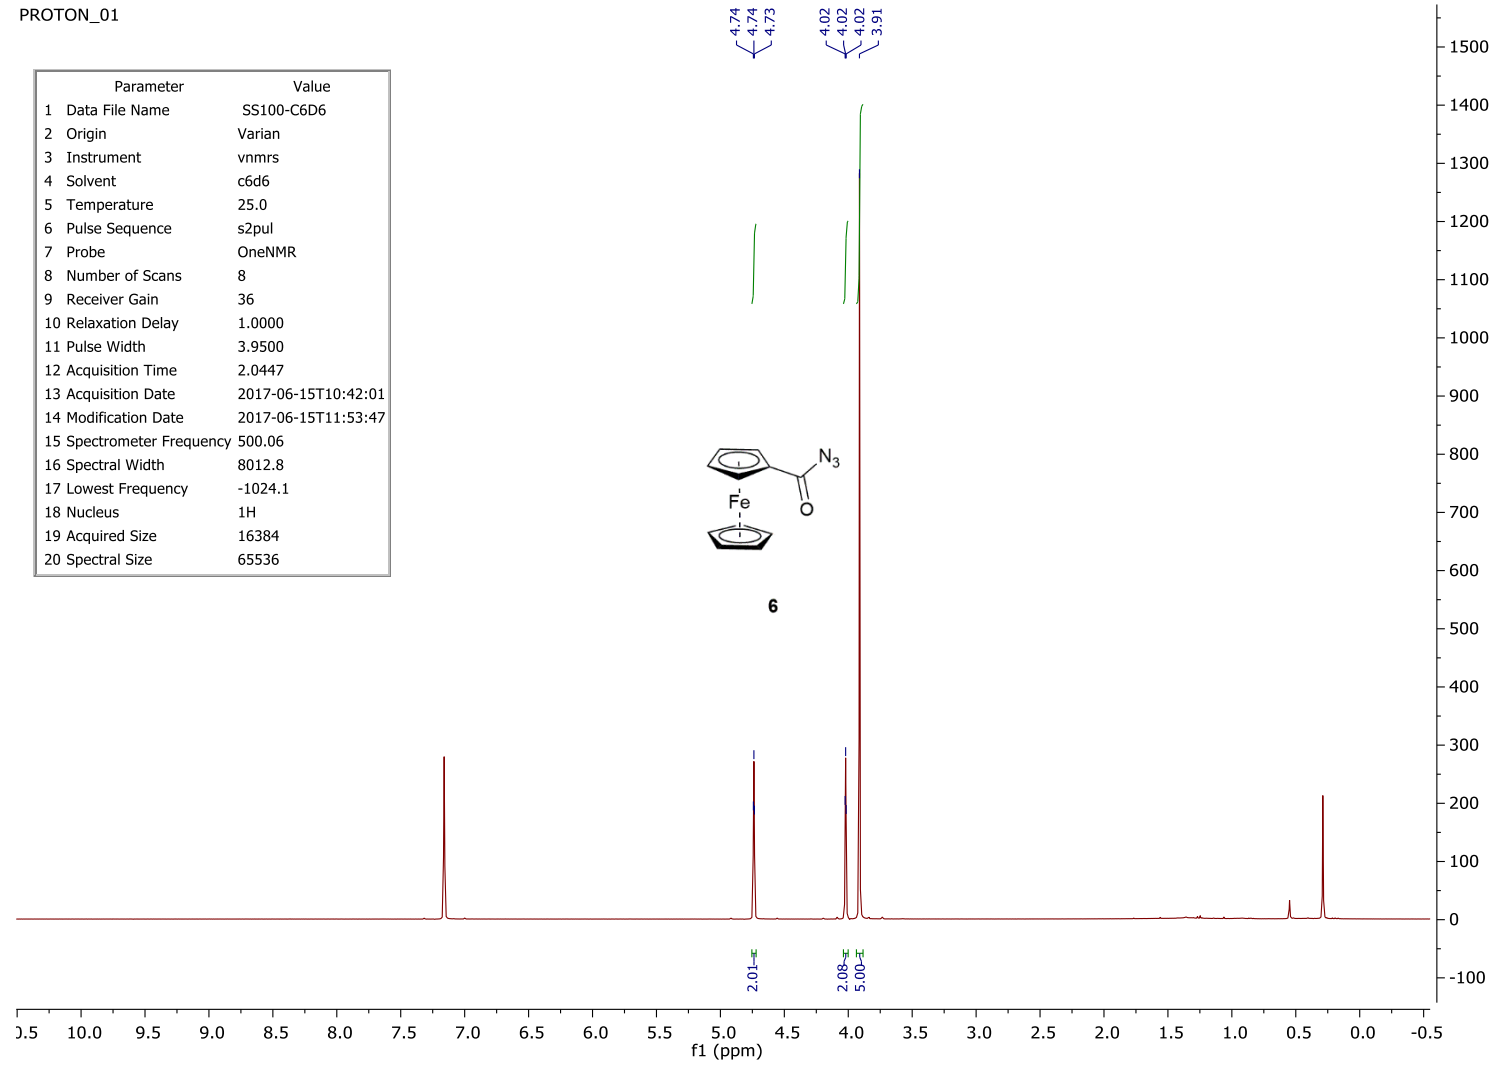

CARBON\_01

| Parameter                 | Value               |
|---------------------------|---------------------|
| 1 Data File Name          | SS100-C6D6          |
| 2 Origin                  | Varian              |
| 3 Instrument              | nmrs                |
| 4 Solvent                 | c6d6                |
| 5 Temperature             | 25.0                |
| 6 Pulse Sequence          | s2pul               |
| 7 Probe                   | OneNMR              |
| 8 Number of Scans         | 128                 |
| 9 Receiver Gain           | 30                  |
| 10 Relaxation Delay       | 1.0000              |
| 11 Pulse Width            | 4.8750              |
| 12 Acquisition Time       | 1.0486              |
| 13 Acquisition Date       | 2017-06-15T15:42:51 |
| 14 Modification Date      | 2017-06-16T09:09:42 |
| 15 Spectrometer Frequency | 125.75              |
| 16 Spectral Width         | 31250.0             |
| 17 Lowest Frequency       | -1684.4             |
| 18 Nucleus                | <sup>13</sup> C     |
| 19 Acquired Size          | 32768               |
| 20 Spectral Size          | 65536               |

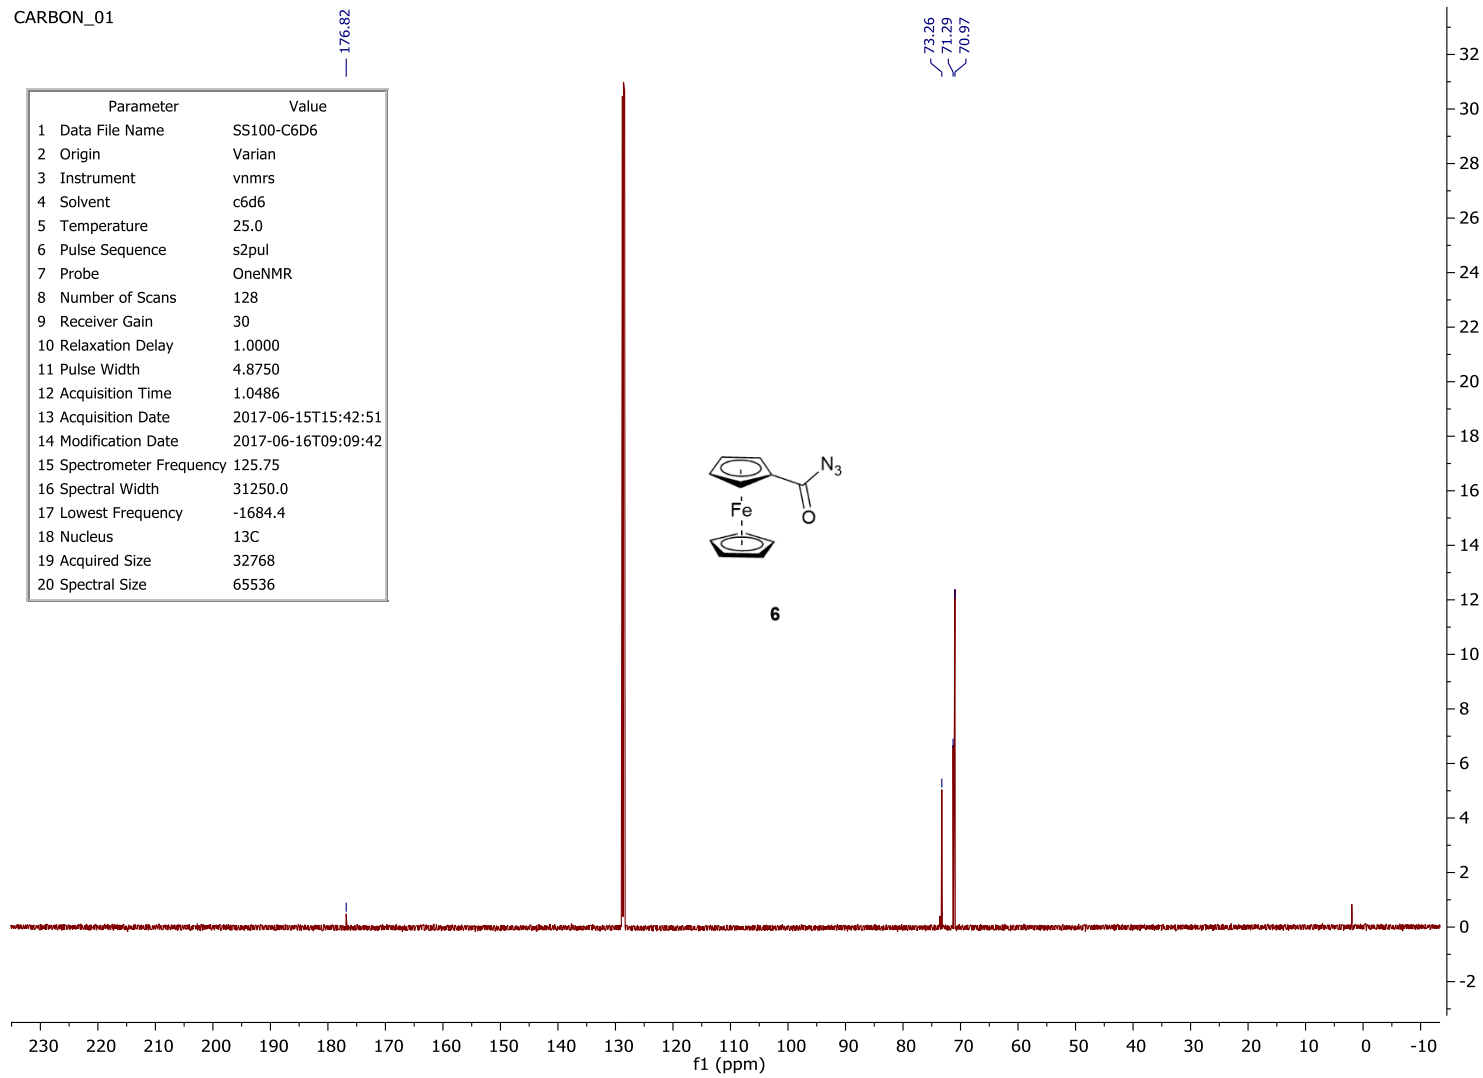

PROTON\_01

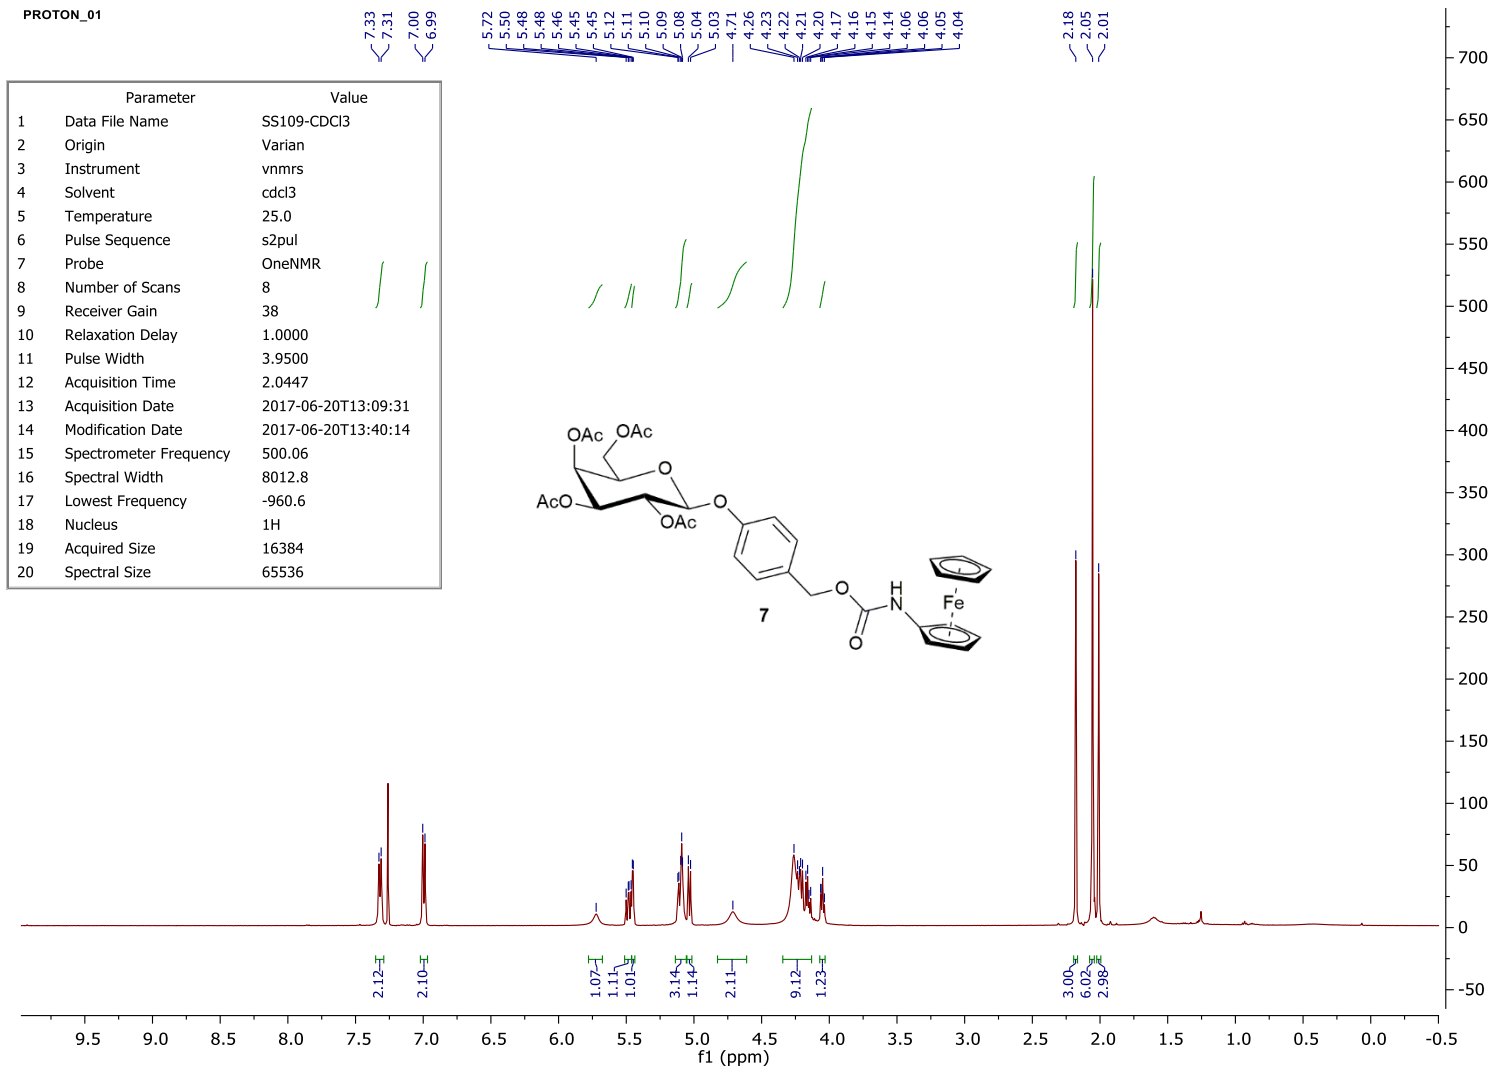

CARBON\_01

| Parameter                 | Value               |
|---------------------------|---------------------|
| 1 Data File Name          | SS109-CDCl3         |
| 2 Origin                  | Varian              |
| 3 Instrument              | vnmrs               |
| 4 Solvent                 | cdcl3               |
| 5 Temperature             | 25.0                |
| 6 Pulse Sequence          | s2pul               |
| 7 Probe                   | OneNMR              |
| 8 Number of Scans         | 2000                |
| 9 Receiver Gain           | 30                  |
| 10 Relaxation Delay       | 1.0000              |
| 11 Pulse Width            | 4.8750              |
| 12 Acquisition Time       | 1.0486              |
| 13 Acquisition Date       | 2017-06-21T05:35:28 |
| 14 Modification Date      | 2017-06-21T08:22:40 |
| 15 Spectrometer Frequency | 125.75              |
| 16 Spectral Width         | 31250.0             |
| 17 Lowest Frequency       | -1793.7             |
| 18 Nucleus                | 13C                 |
| 19 Acquired Size          | 32768               |
| 20 Spectral Size          | 65536               |

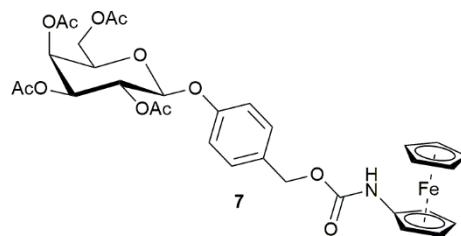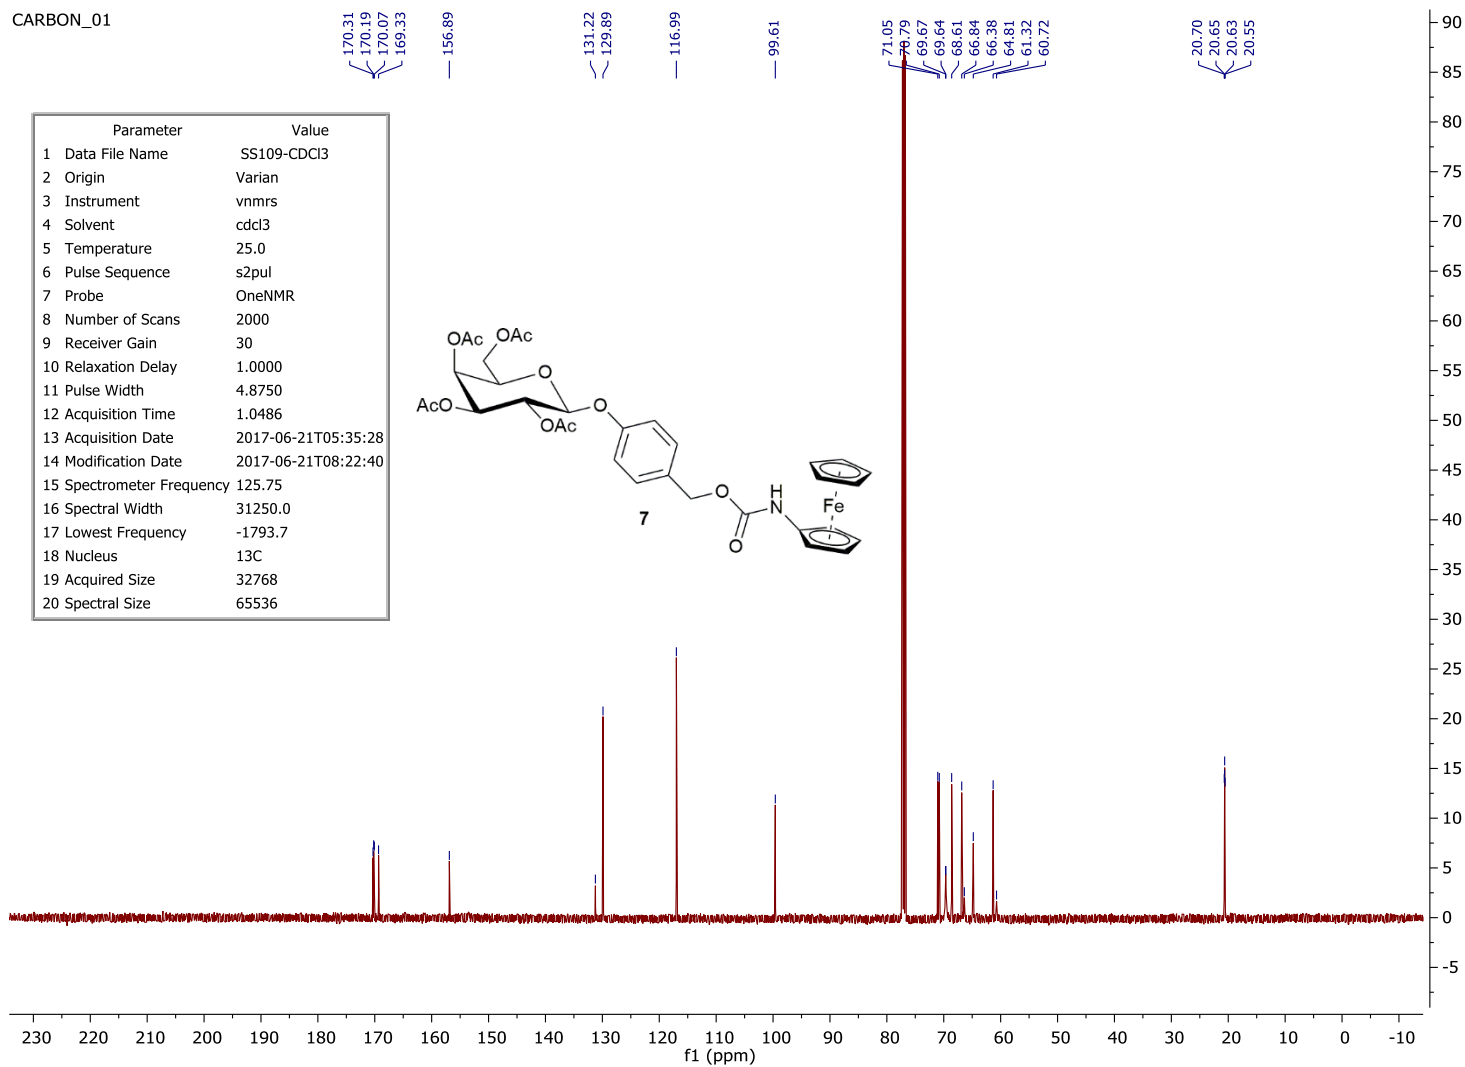

PROTON\_01

| Parameter                 | Value               |
|---------------------------|---------------------|
| 1 Data File Name          | SS070-MeOD          |
| 2 Origin                  | Varian              |
| 3 Instrument              | vnmrs               |
| 4 Solvent                 | cd3od               |
| 5 Temperature             | 25.0                |
| 6 Pulse Sequence          | s2pul               |
| 7 Probe                   | OneNMR              |
| 8 Number of Scans         | 8                   |
| 9 Receiver Gain           | 38                  |
| 10 Relaxation Delay       | 1.0000              |
| 11 Pulse Width            | 3.9500              |
| 12 Acquisition Time       | 2.0447              |
| 13 Acquisition Date       | 2017-06-26T10:58:39 |
| 14 Modification Date      | 2017-06-26T12:25:10 |
| 15 Spectrometer Frequency | 500.06              |
| 16 Spectral Width         | 8012.8              |
| 17 Lowest Frequency       | -1003.5             |
| 18 Nucleus                | 1H                  |
| 19 Acquired Size          | 16384               |
| 20 Spectral Size          | 65536               |

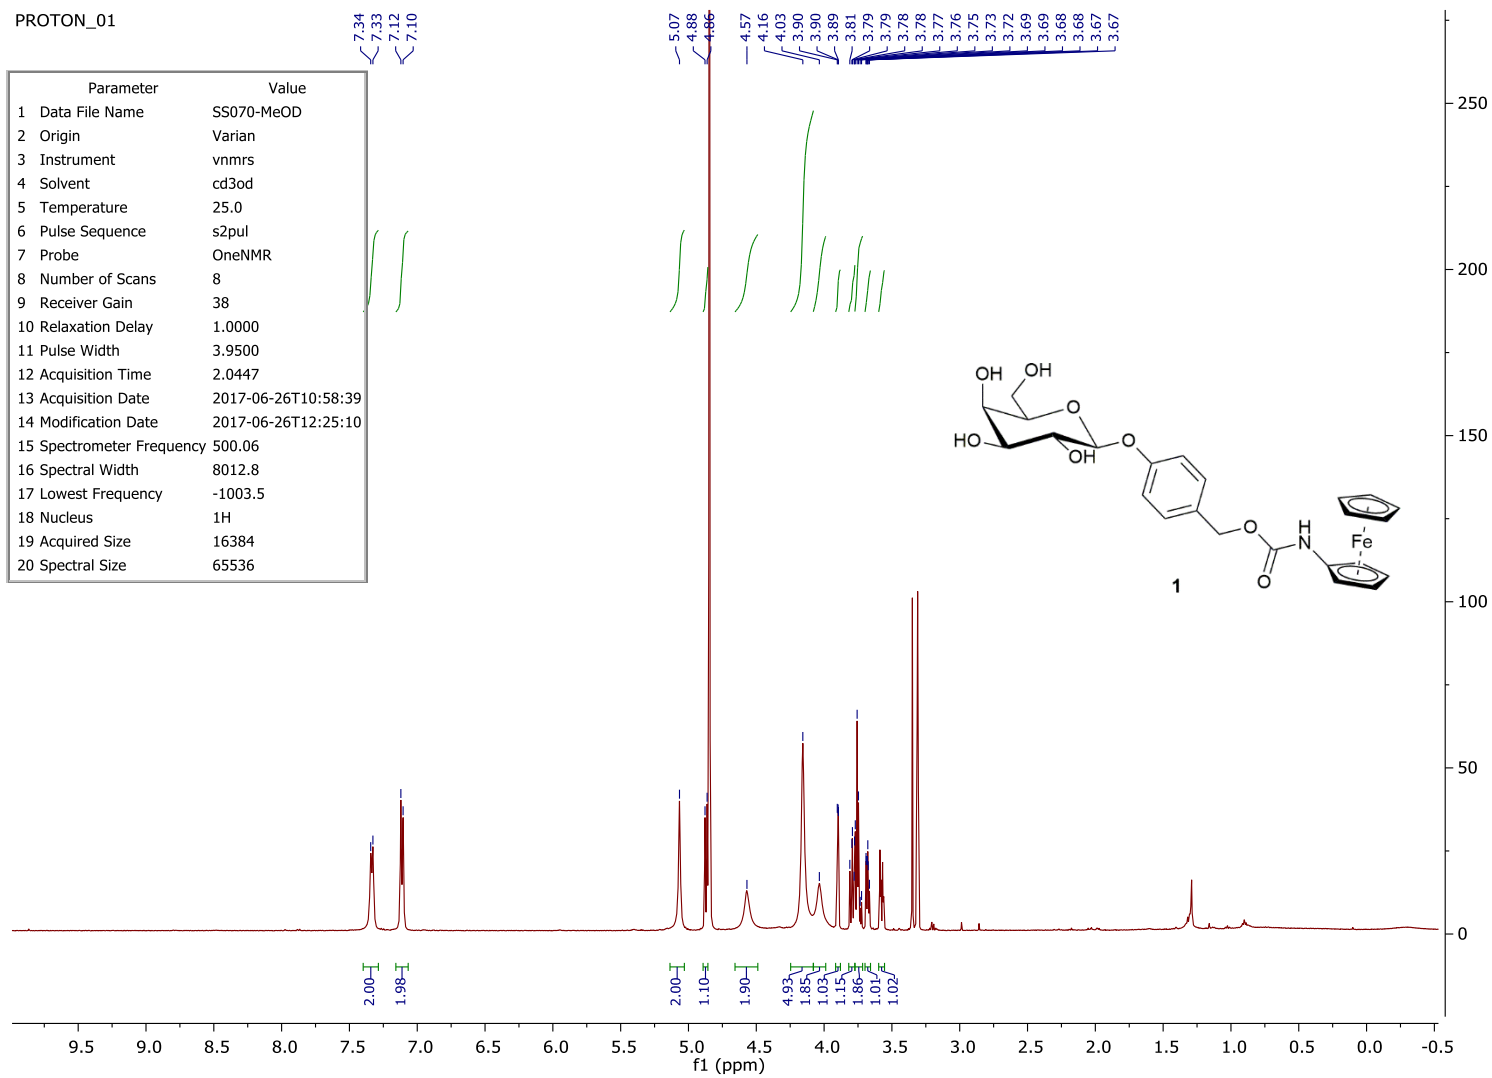

CARBON\_02

| Parameter                 | Value               |
|---------------------------|---------------------|
| 1 Data File Name          | SS070-Clean_MeOD    |
| 2 Origin                  | Varian              |
| 3 Instrument              | vnmrs               |
| 4 Solvent                 | cd3od               |
| 5 Temperature             | 25.0                |
| 6 Pulse Sequence          | s2pul               |
| 7 Probe                   | OneNMR              |
| 8 Number of Scans         | 2000                |
| 9 Receiver Gain           | 30                  |
| 10 Relaxation Delay       | 1.0000              |
| 11 Pulse Width            | 4.8750              |
| 12 Acquisition Time       | 1.0486              |
| 13 Acquisition Date       | 2017-03-23T19:52:46 |
| 14 Modification Date      | 2017-03-24T11:13:07 |
| 15 Spectrometer Frequency | 125.75              |
| 16 Spectral Width         | 31250.0             |
| 17 Lowest Frequency       | -1613.7             |
| 18 Nucleus                | <sup>13</sup> C     |
| 19 Acquired Size          | 32768               |
| 20 Spectral Size          | 65536               |

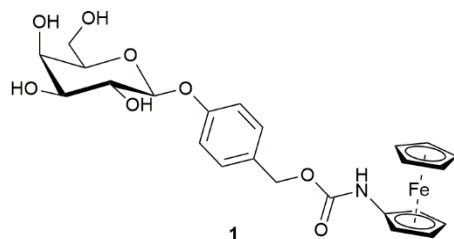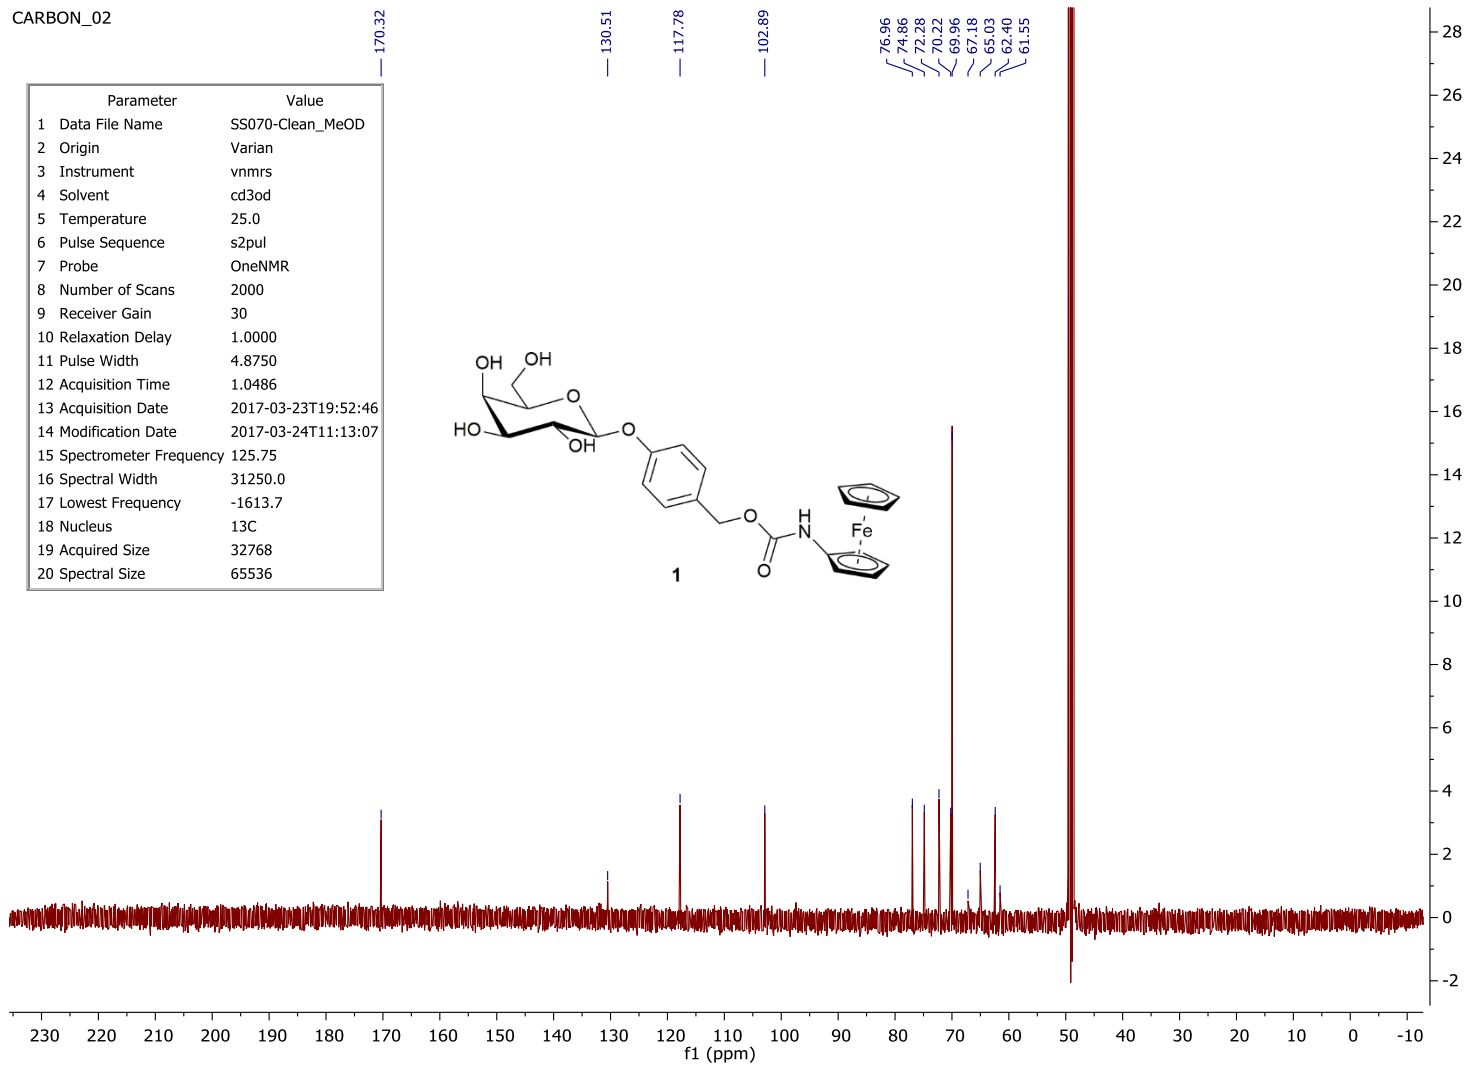



PROTON\_01

| Parameter                 | Value               |
|---------------------------|---------------------|
| 1 Data File Name          | SS098-CDCl3         |
| 2 Origin                  | Varian              |
| 3 Instrument              | vnmrs               |
| 4 Solvent                 | cdcl3               |
| 5 Temperature             | 25.0                |
| 6 Pulse Sequence          | s2pul               |
| 7 Probe                   | OneNMR              |
| 8 Number of Scans         | 8                   |
| 9 Receiver Gain           | 40                  |
| 10 Relaxation Delay       | 1.0000              |
| 11 Pulse Width            | 3.9500              |
| 12 Acquisition Time       | 2.0447              |
| 13 Acquisition Date       | 2017-06-06T09:07:44 |
| 14 Modification Date      | 2017-06-06T09:17:46 |
| 15 Spectrometer Frequency | 500.06              |
| 16 Spectral Width         | 8012.8              |
| 17 Lowest Frequency       | -1000.6             |
| 18 Nucleus                | 1H                  |
| 19 Acquired Size          | 16384               |
| 20 Spectral Size          | 65536               |

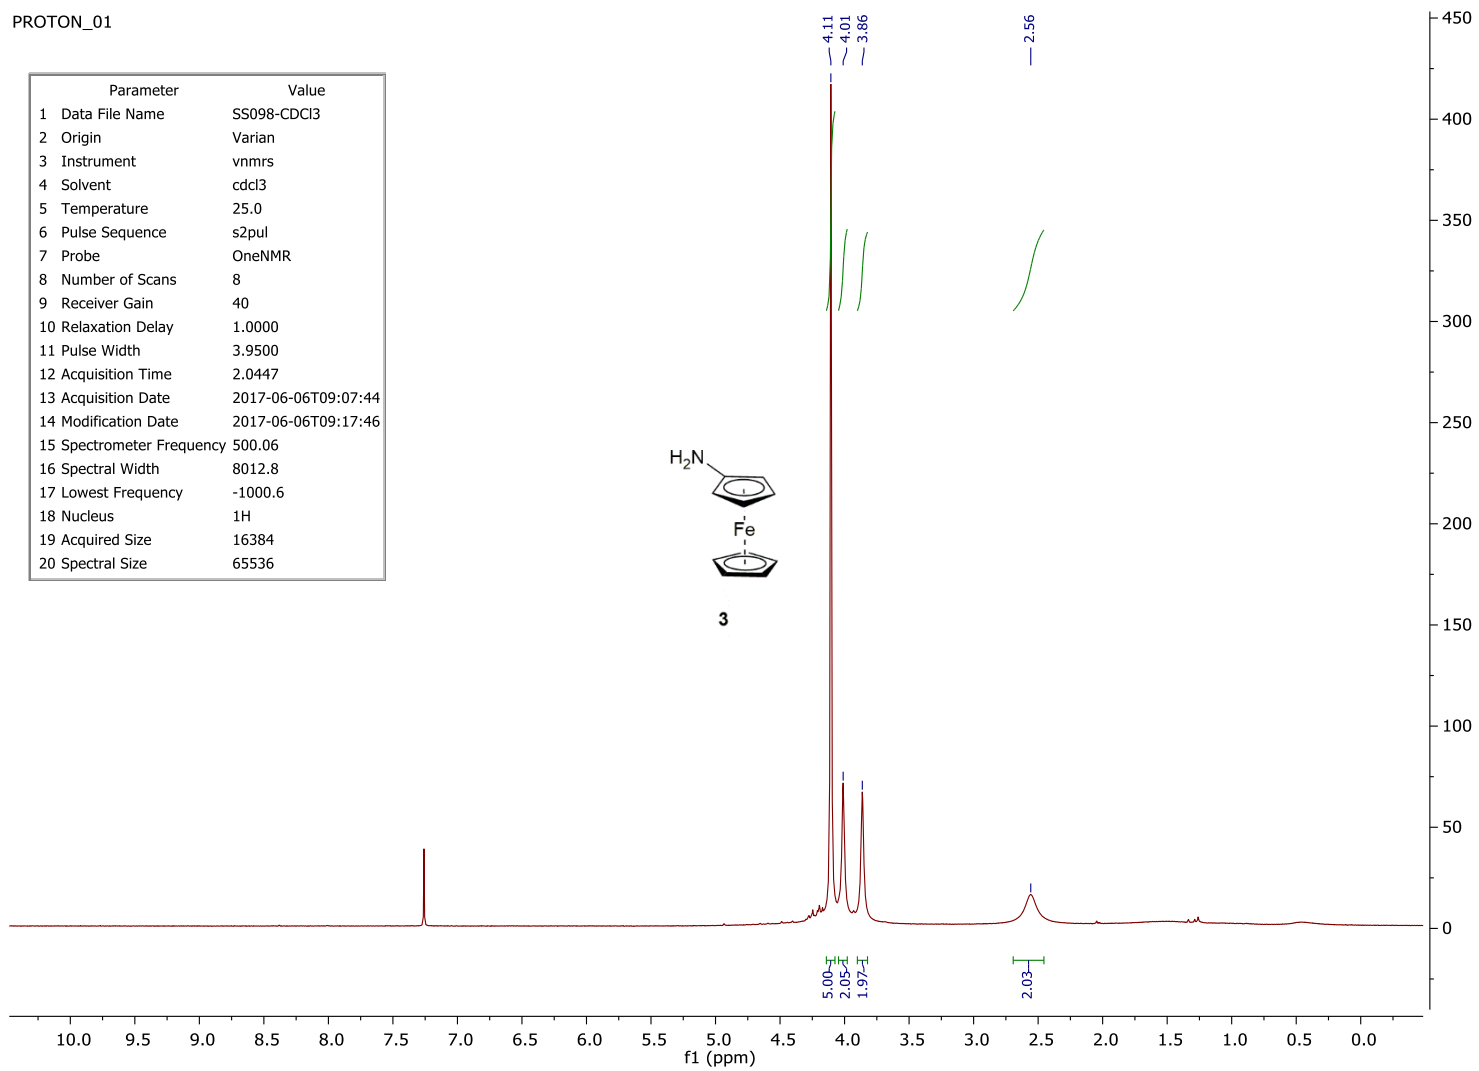

CARBON\_01

| Parameter                 | Value               |
|---------------------------|---------------------|
| 1 Data File Name          | SS098-CDCl3         |
| 2 Origin                  | Varian              |
| 3 Instrument              | vnmrs               |
| 4 Solvent                 | cdcl3               |
| 5 Temperature             | 25.0                |
| 6 Pulse Sequence          | s2pul               |
| 7 Probe                   | OneNMR              |
| 8 Number of Scans         | 128                 |
| 9 Receiver Gain           | 30                  |
| 10 Relaxation Delay       | 1.0000              |
| 11 Pulse Width            | 4.8750              |
| 12 Acquisition Time       | 1.0486              |
| 13 Acquisition Date       | 2017-06-06T10:19:19 |
| 14 Modification Date      | 2017-06-06T10:49:02 |
| 15 Spectrometer Frequency | 125.75              |
| 16 Spectral Width         | 31250.0             |
| 17 Lowest Frequency       | -1793.7             |
| 18 Nucleus                | 13C                 |
| 19 Acquired Size          | 32768               |
| 20 Spectral Size          | 65536               |

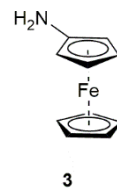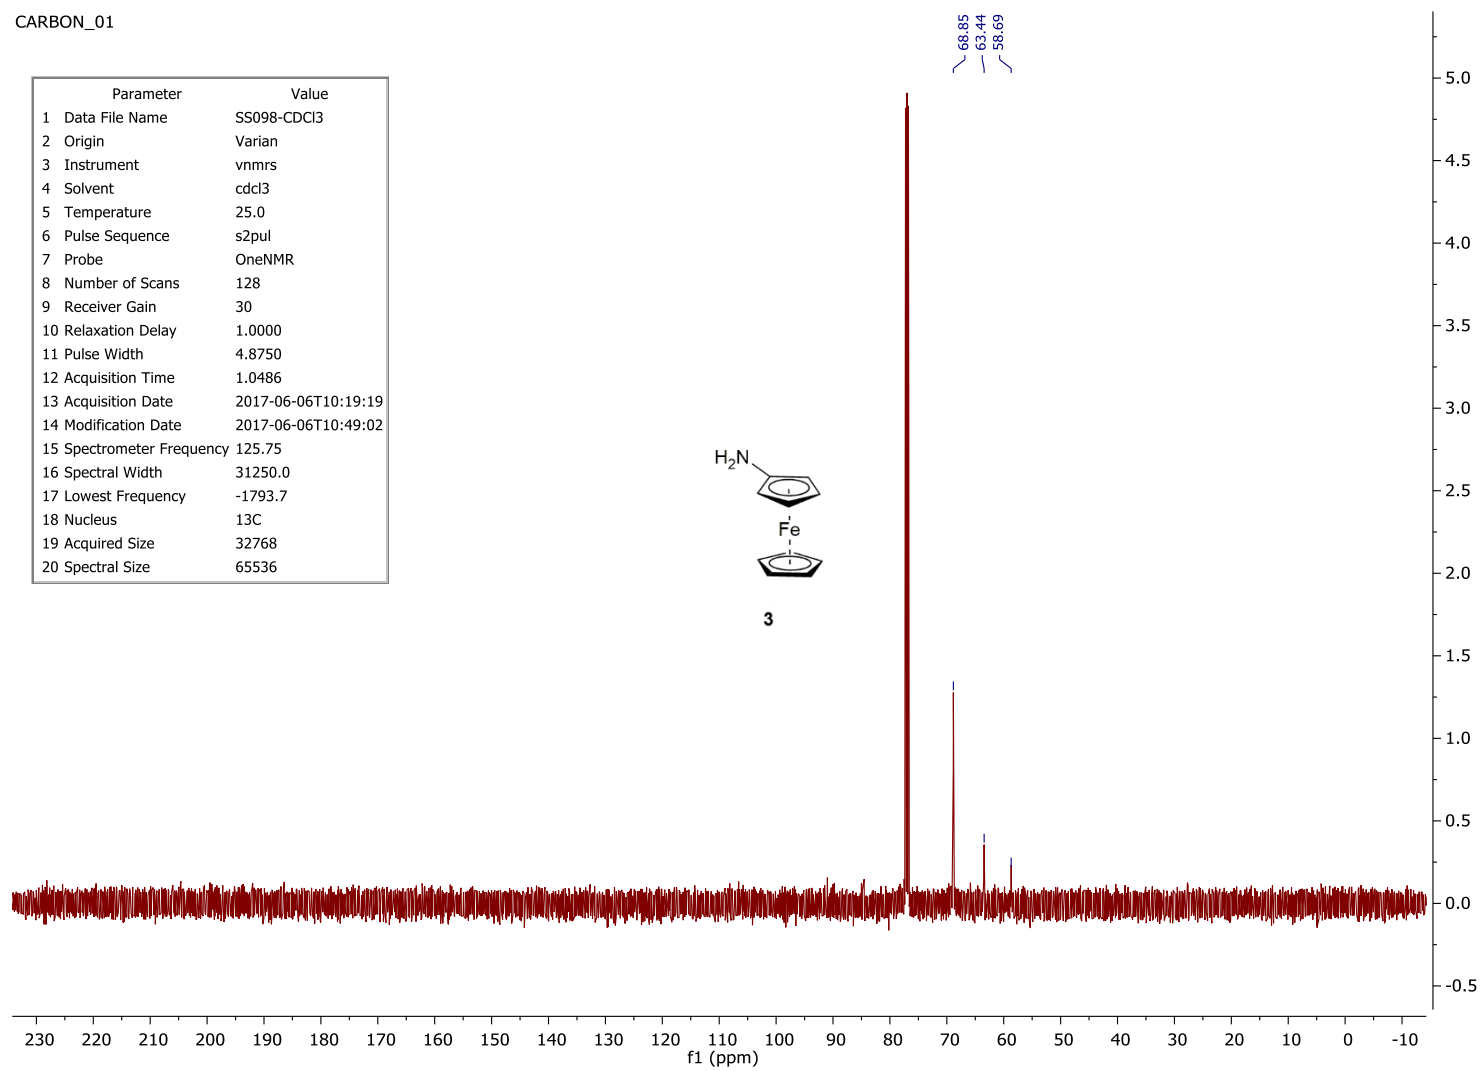

PROTON 91

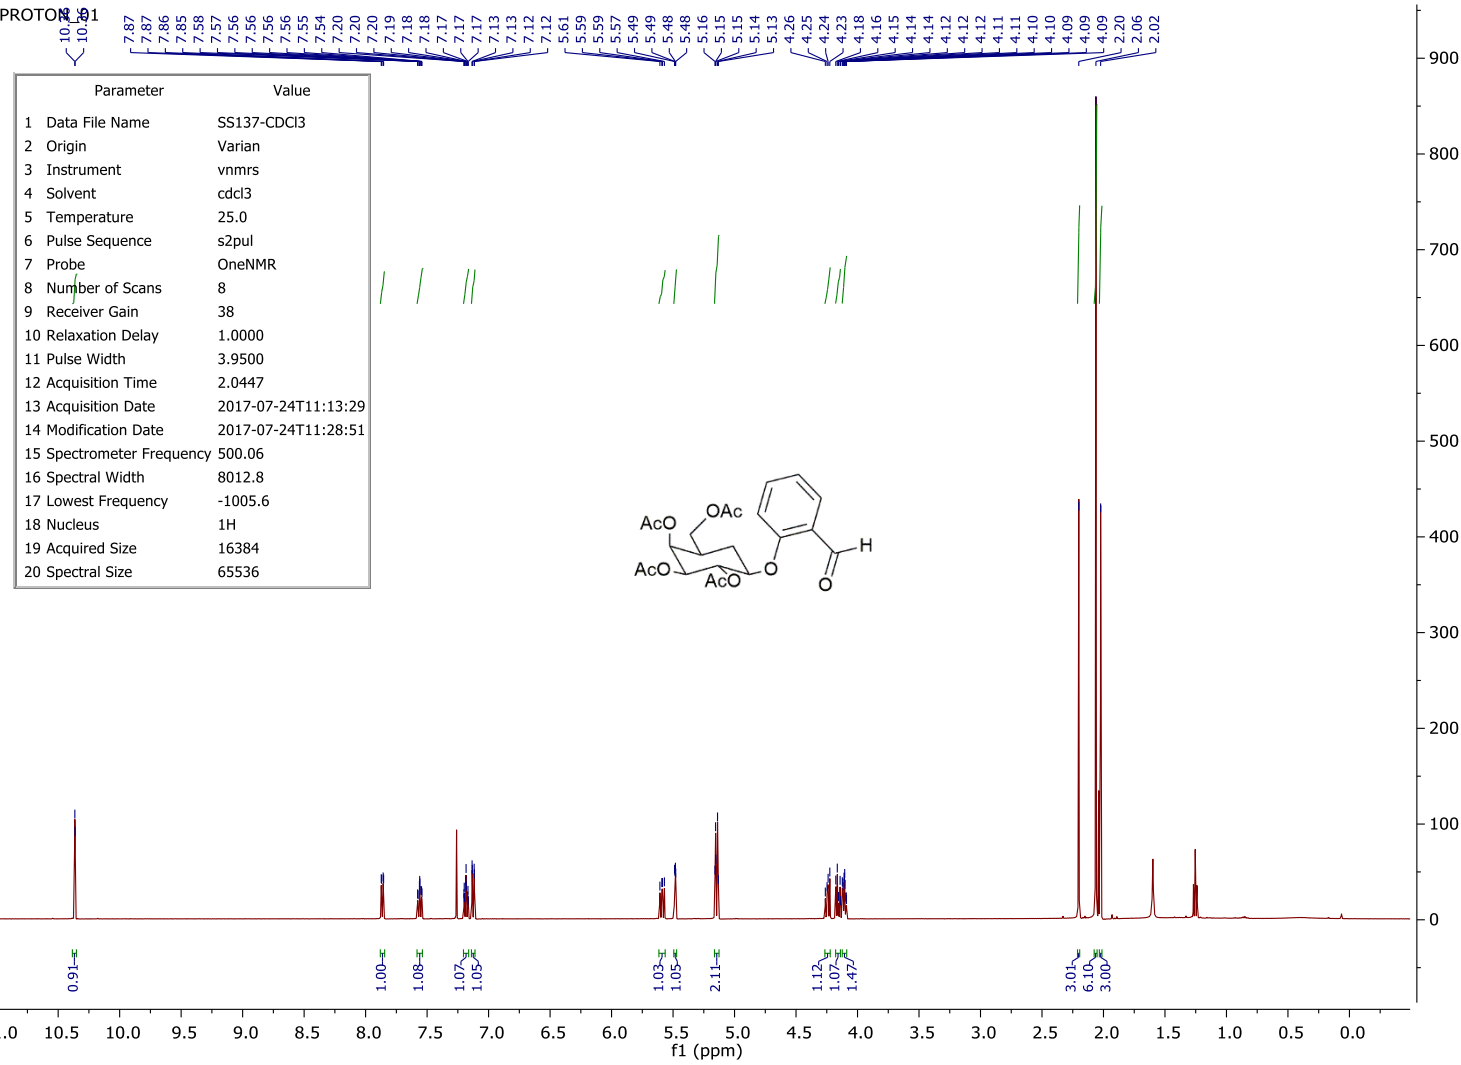

| Parameter                 | Value               |
|---------------------------|---------------------|
| 1 Data File Name          | SS137-CDCI3         |
| 2 Origin                  | Varian              |
| 3 Instrument              | vnmrs               |
| 4 Solvent                 | cdcl3               |
| 5 Temperature             | 25.0                |
| 6 Pulse Sequence          | s2pul               |
| 7 Probe                   | OneNMR              |
| 8 Number of Scans         | 8                   |
| 9 Receiver Gain           | 38                  |
| 10 Relaxation Delay       | 1.0000              |
| 11 Pulse Width            | 3.9500              |
| 12 Acquisition Time       | 2.0447              |
| 13 Acquisition Date       | 2017-07-24T11:13:29 |
| 14 Modification Date      | 2017-07-24T11:28:51 |
| 15 Spectrometer Frequency | 500.06              |
| 16 Spectral Width         | 8012.8              |
| 17 Lowest Frequency       | -1005.6             |
| 18 Nucleus                | 1H                  |
| 19 Acquired Size          | 16384               |
| 20 Spectral Size          | 65536               |

CARBON\_01

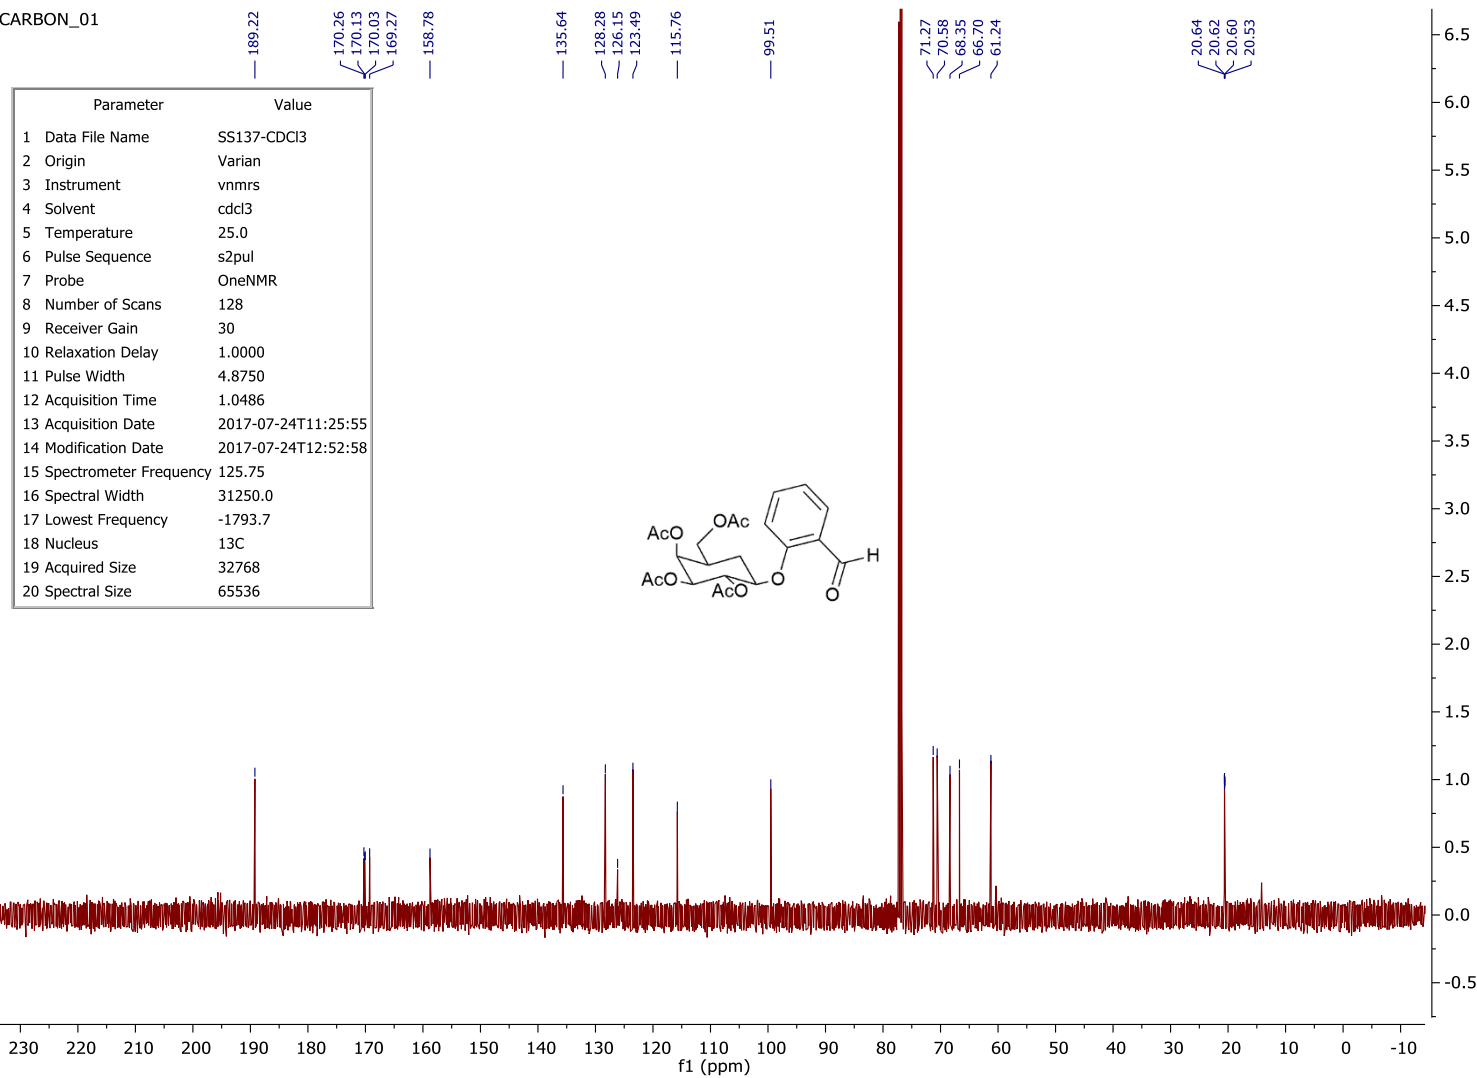

PROTON\_01

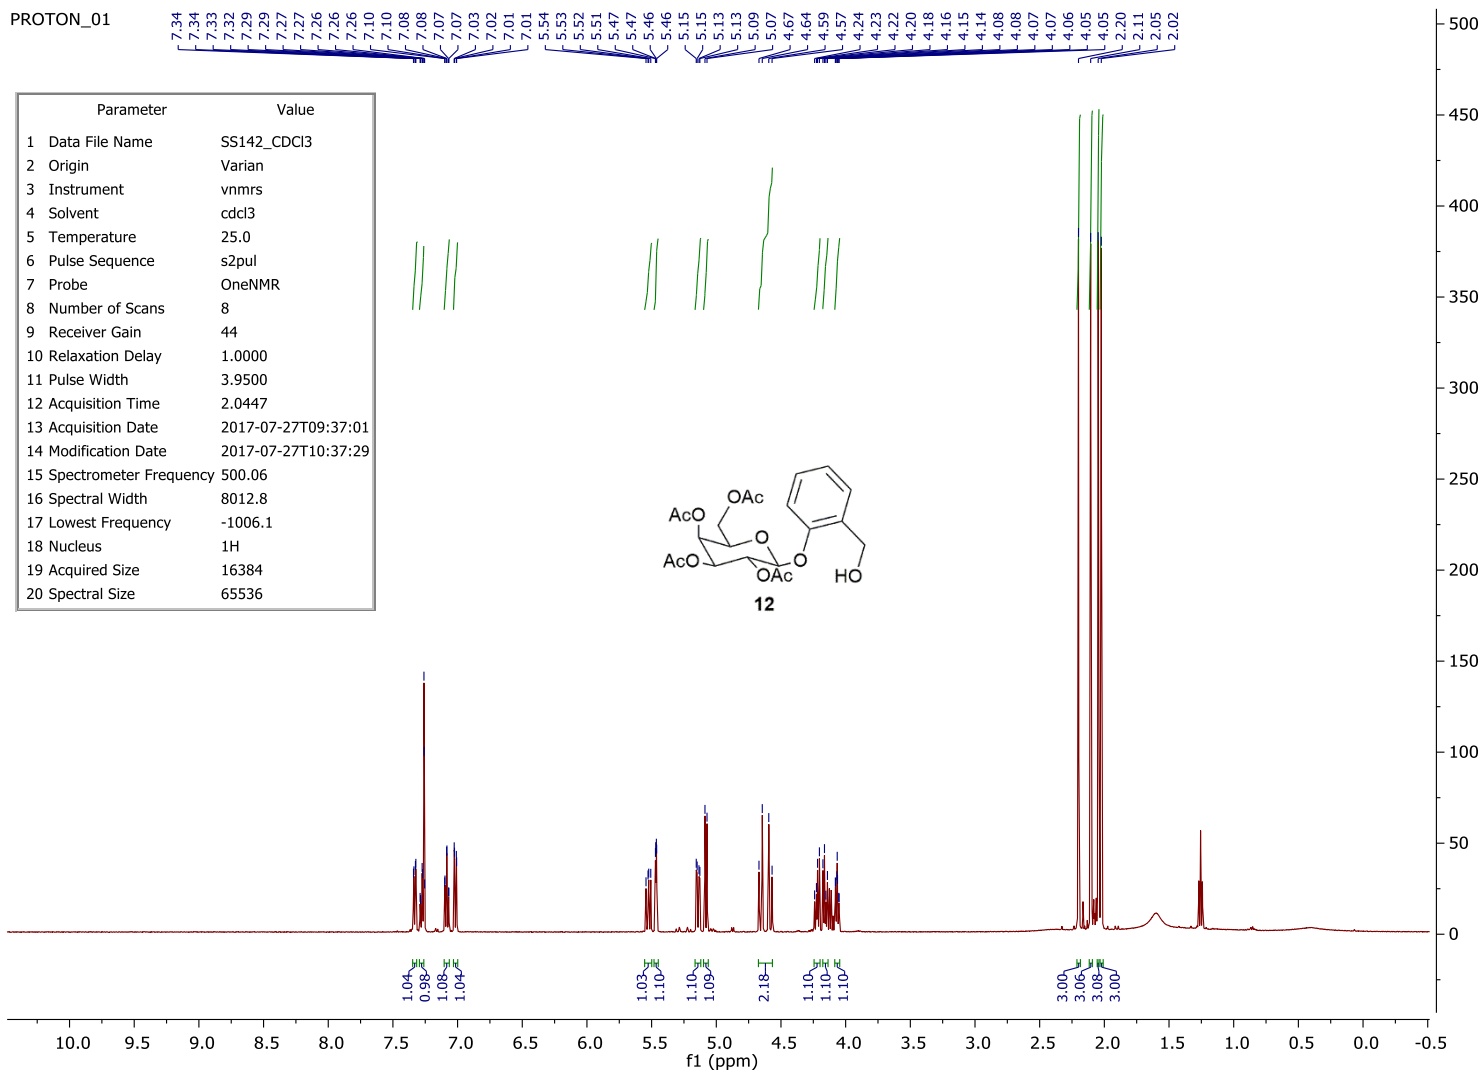

CARBON\_01

| Parameter                 | Value               |
|---------------------------|---------------------|
| 1 Data File Name          | SS142_CDCI3         |
| 2 Origin                  | Varian              |
| 3 Instrument              | vnmrs               |
| 4 Solvent                 | cdcl3               |
| 5 Temperature             | 25.0                |
| 6 Pulse Sequence          | s2pul               |
| 7 Probe                   | OneNMR              |
| 8 Number of Scans         | 128                 |
| 9 Receiver Gain           | 30                  |
| 10 Relaxation Delay       | 1.0000              |
| 11 Pulse Width            | 4.8750              |
| 12 Acquisition Time       | 1.0486              |
| 13 Acquisition Date       | 2017-07-27T10:53:20 |
| 14 Modification Date      | 2017-07-27T11:30:45 |
| 15 Spectrometer Frequency | 125.75              |
| 16 Spectral Width         | 31250.0             |
| 17 Lowest Frequency       | -1793.7             |
| 18 Nucleus                | 13C                 |
| 19 Acquired Size          | 32768               |
| 20 Spectral Size          | 65536               |

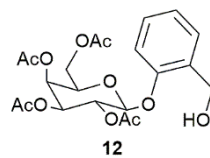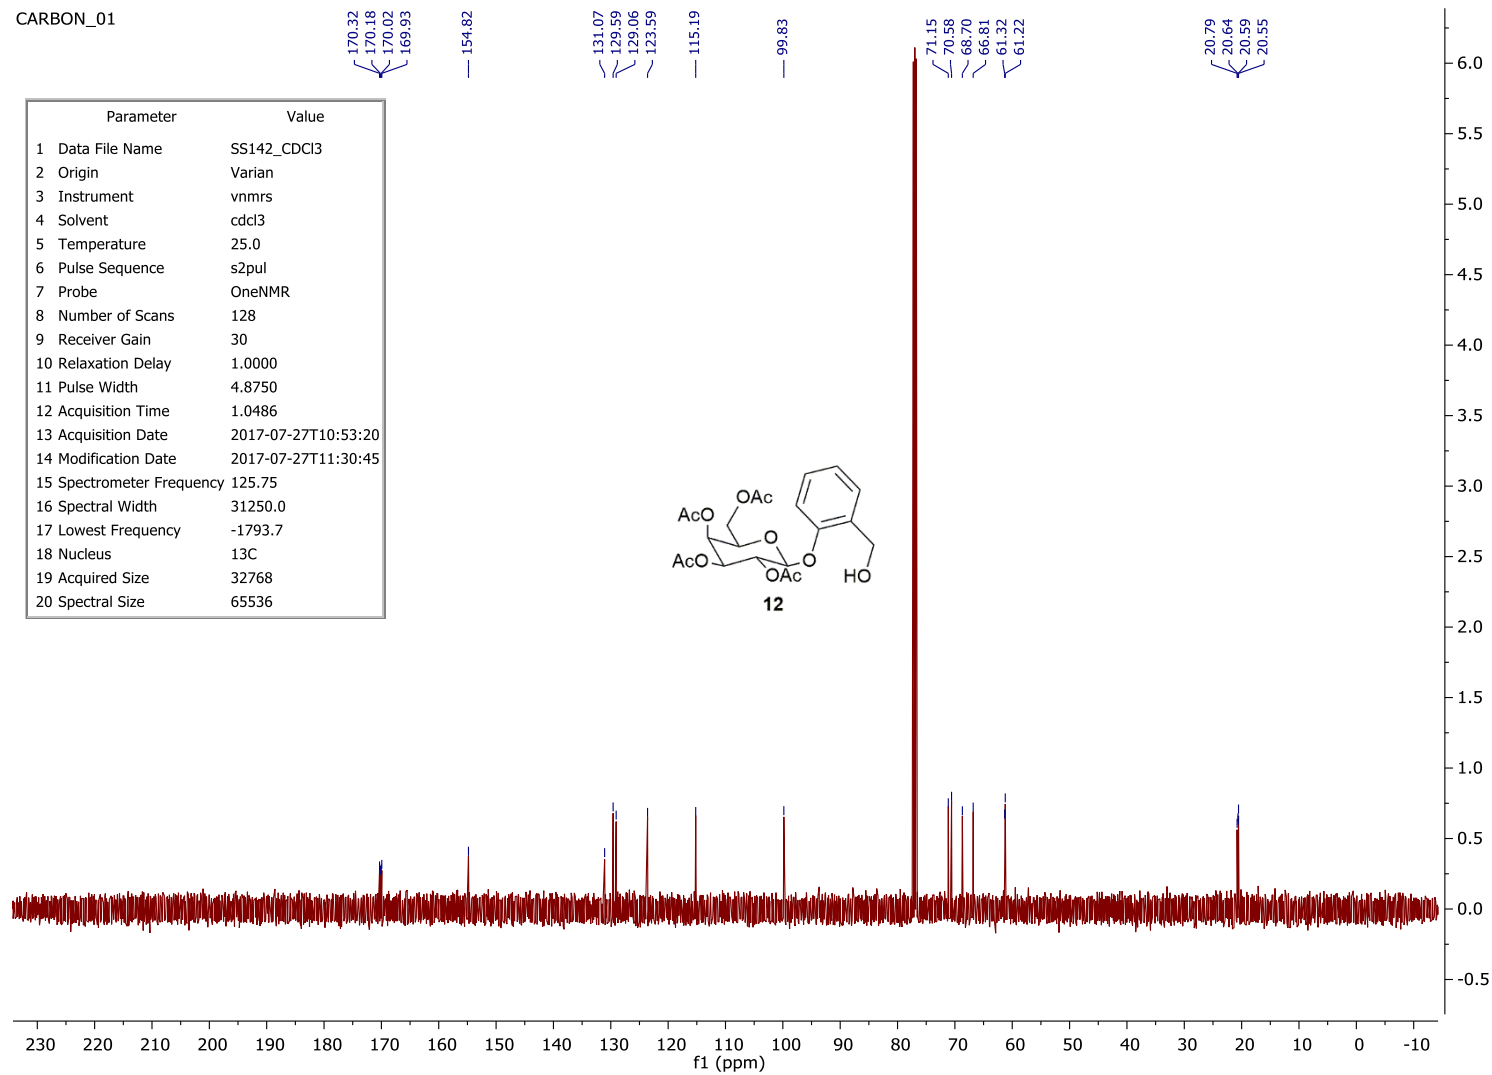

PROTON\_01

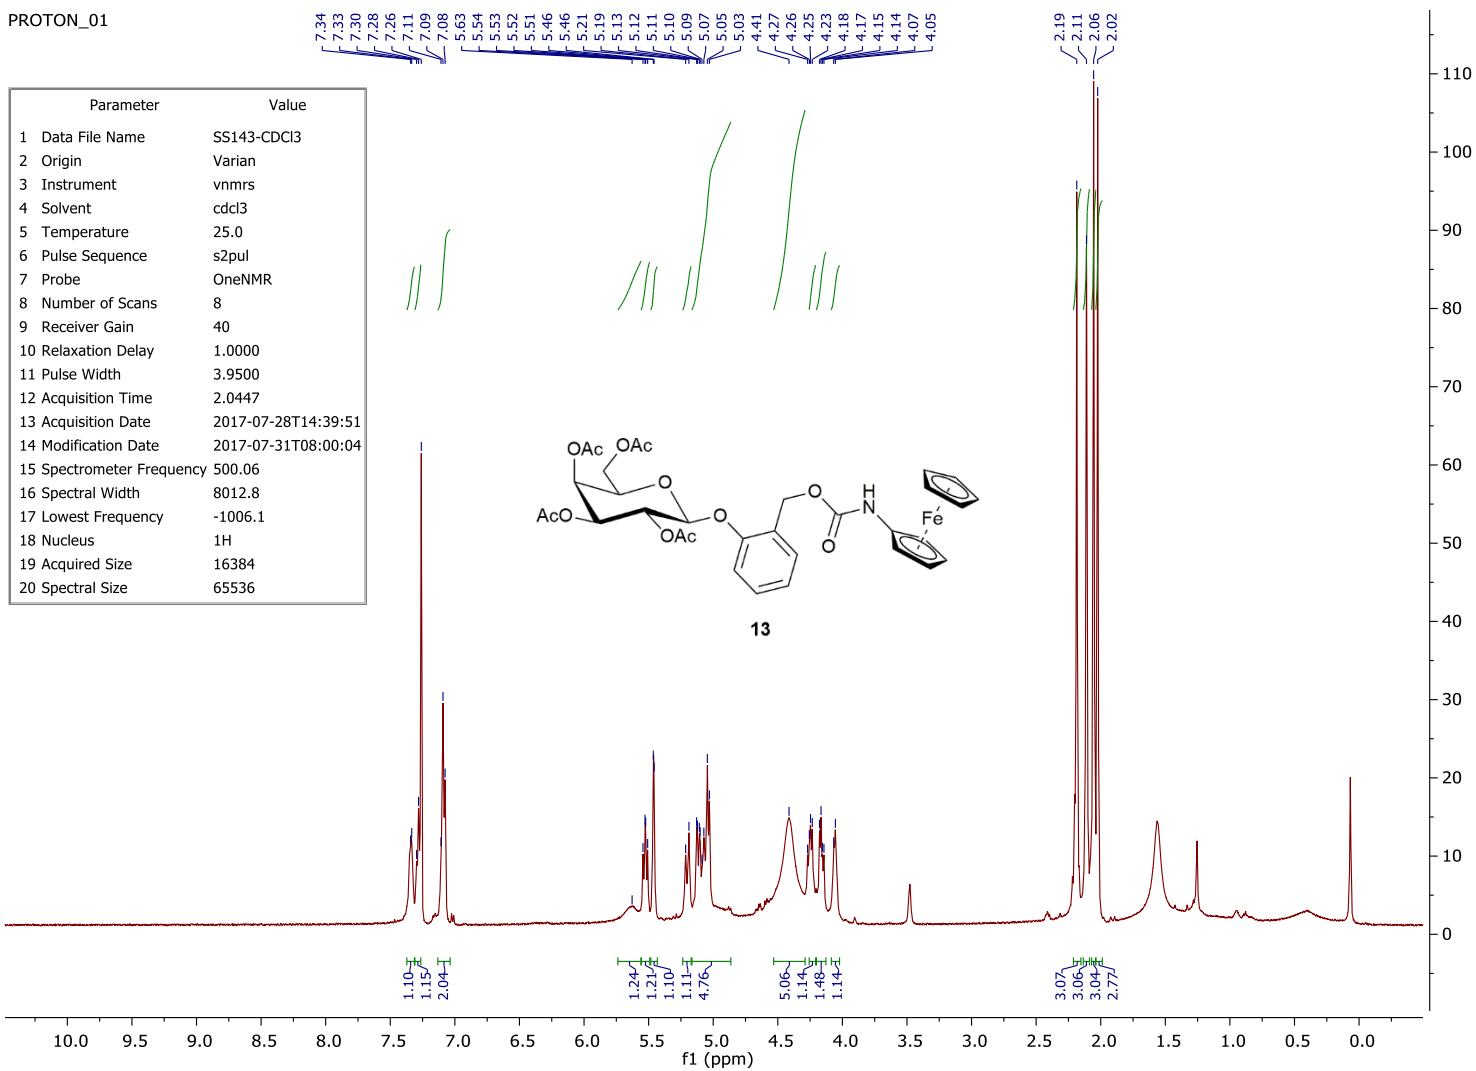

CARBON\_01

| Parameter                 | Value               |
|---------------------------|---------------------|
| 1 Data File Name          | SS143-CDCI3         |
| 2 Origin                  | Varian              |
| 3 Instrument              | vnmrs               |
| 4 Solvent                 | cdcl3               |
| 5 Temperature             | 25.0                |
| 6 Pulse Sequence          | s2pul               |
| 7 Probe                   | OneNMR              |
| 8 Number of Scans         | 2000                |
| 9 Receiver Gain           | 30                  |
| 10 Relaxation Delay       | 1.0000              |
| 11 Pulse Width            | 4.8750              |
| 12 Acquisition Time       | 1.0486              |
| 13 Acquisition Date       | 2017-07-28T22:39:37 |
| 14 Modification Date      | 2017-07-31T07:59:54 |
| 15 Spectrometer Frequency | 125.75              |
| 16 Spectral Width         | 31250.0             |
| 17 Lowest Frequency       | -1793.7             |
| 18 Nucleus                | 13C                 |
| 19 Acquired Size          | 32768               |
| 20 Spectral Size          | 65536               |

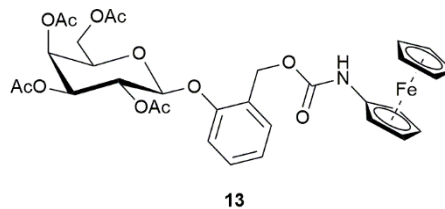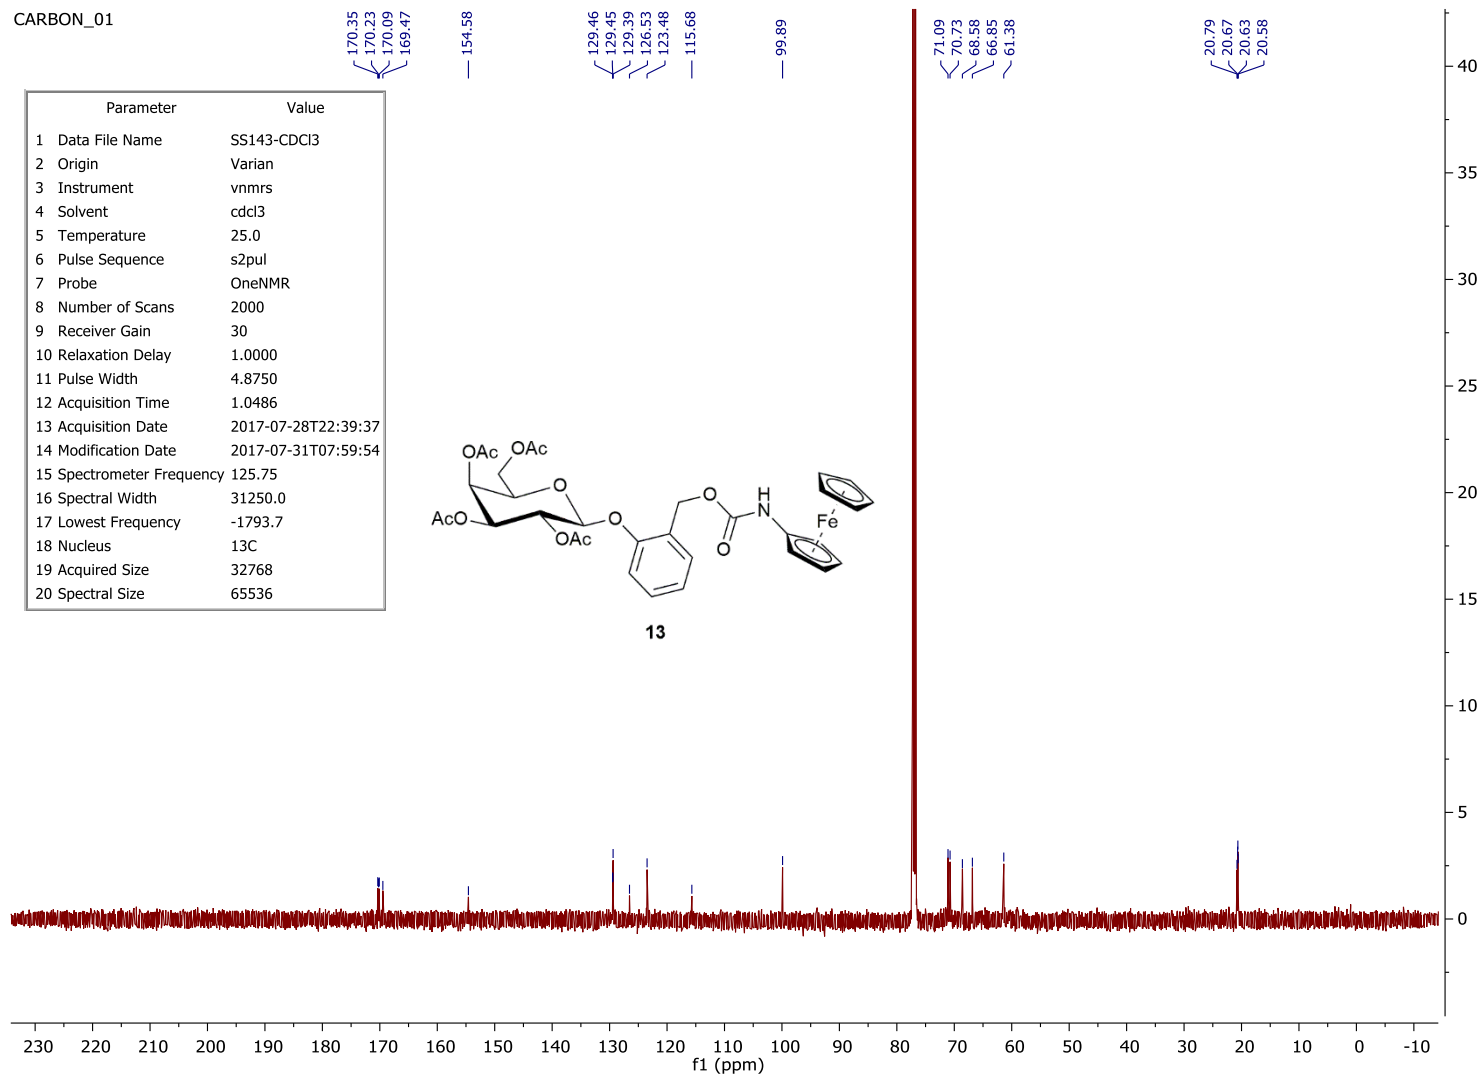



PROTON\_01

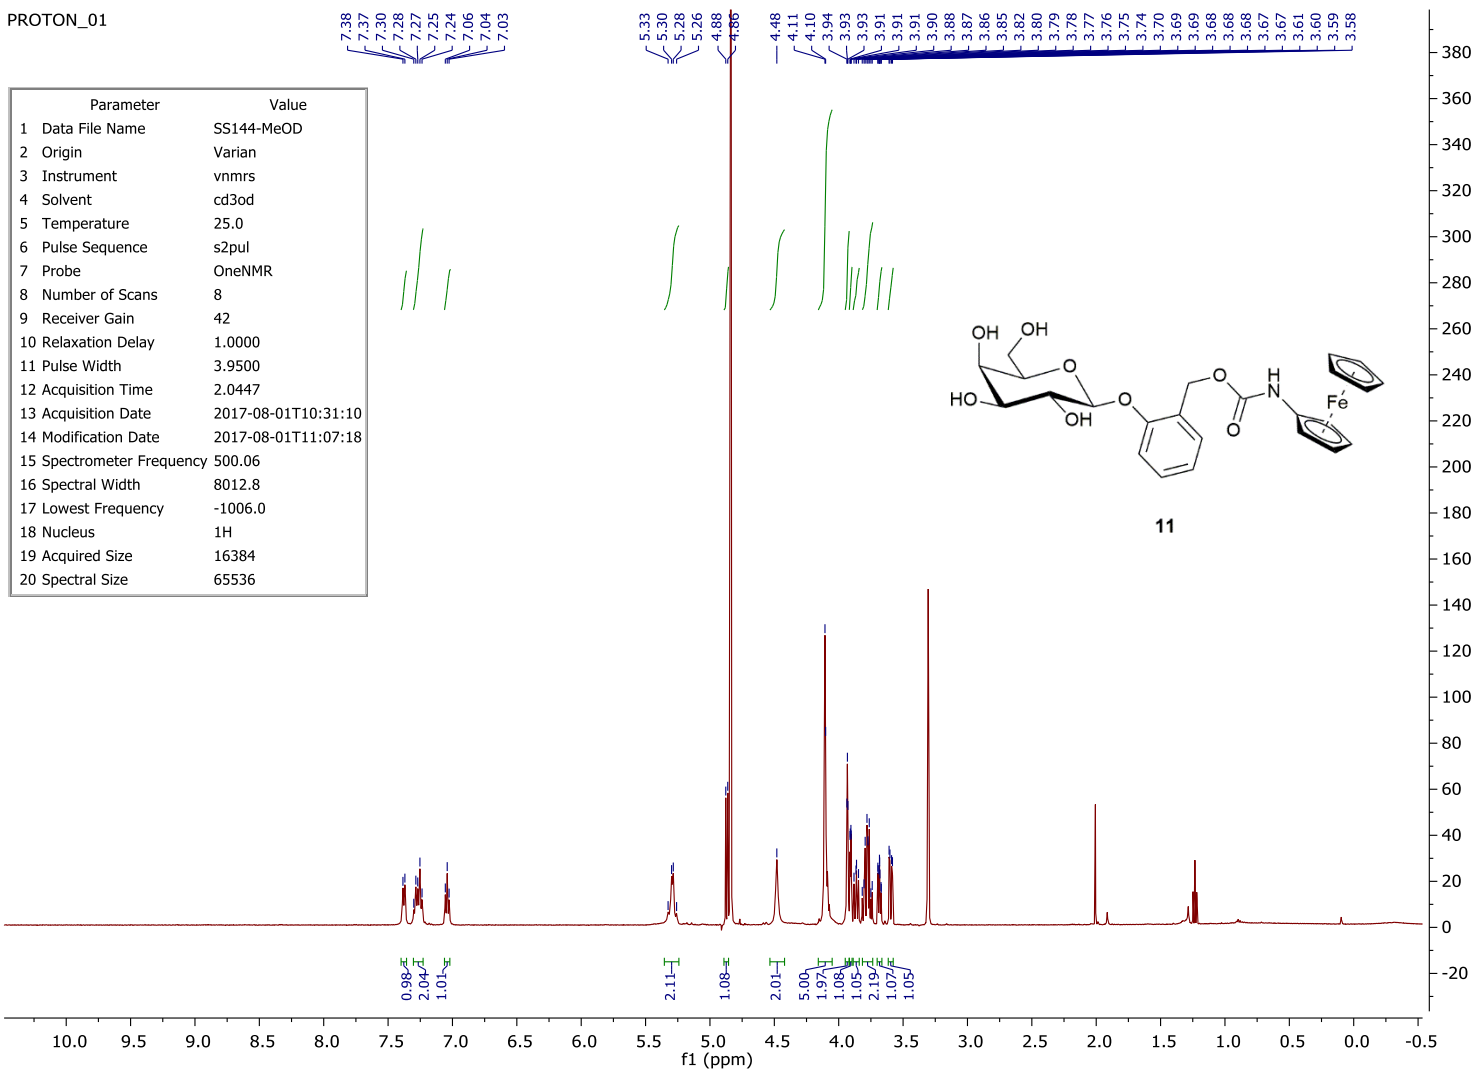

CARBON\_01

| Parameter                 | Value               |
|---------------------------|---------------------|
| 1 Data File Name          | SS144-MeOD          |
| 2 Origin                  | Varian              |
| 3 Instrument              | vnmrs               |
| 4 Solvent                 | cd3od               |
| 5 Temperature             | 25.0                |
| 6 Pulse Sequence          | s2pul               |
| 7 Probe                   | OneNMR              |
| 8 Number of Scans         | 2000                |
| 9 Receiver Gain           | 30                  |
| 10 Relaxation Delay       | 1.0000              |
| 11 Pulse Width            | 4.8750              |
| 12 Acquisition Time       | 1.0486              |
| 13 Acquisition Date       | 2017-08-02T05:24:01 |
| 14 Modification Date      | 2017-08-02T08:21:15 |
| 15 Spectrometer Frequency | 125.75              |
| 16 Spectral Width         | 31250.0             |
| 17 Lowest Frequency       | -1614.9             |
| 18 Nucleus                | <sup>13</sup> C     |
| 19 Acquired Size          | 32768               |
| 20 Spectral Size          | 65536               |

— 156.86  
130.40  
129.85  
127.77  
123.42  
— 116.77  
— 103.70  
77.07  
74.87  
72.35  
70.23  
70.03  
65.07  
62.81  
62.47  
61.56

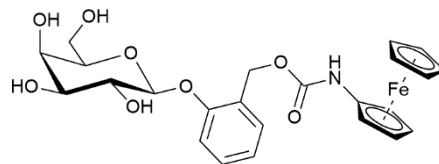

11

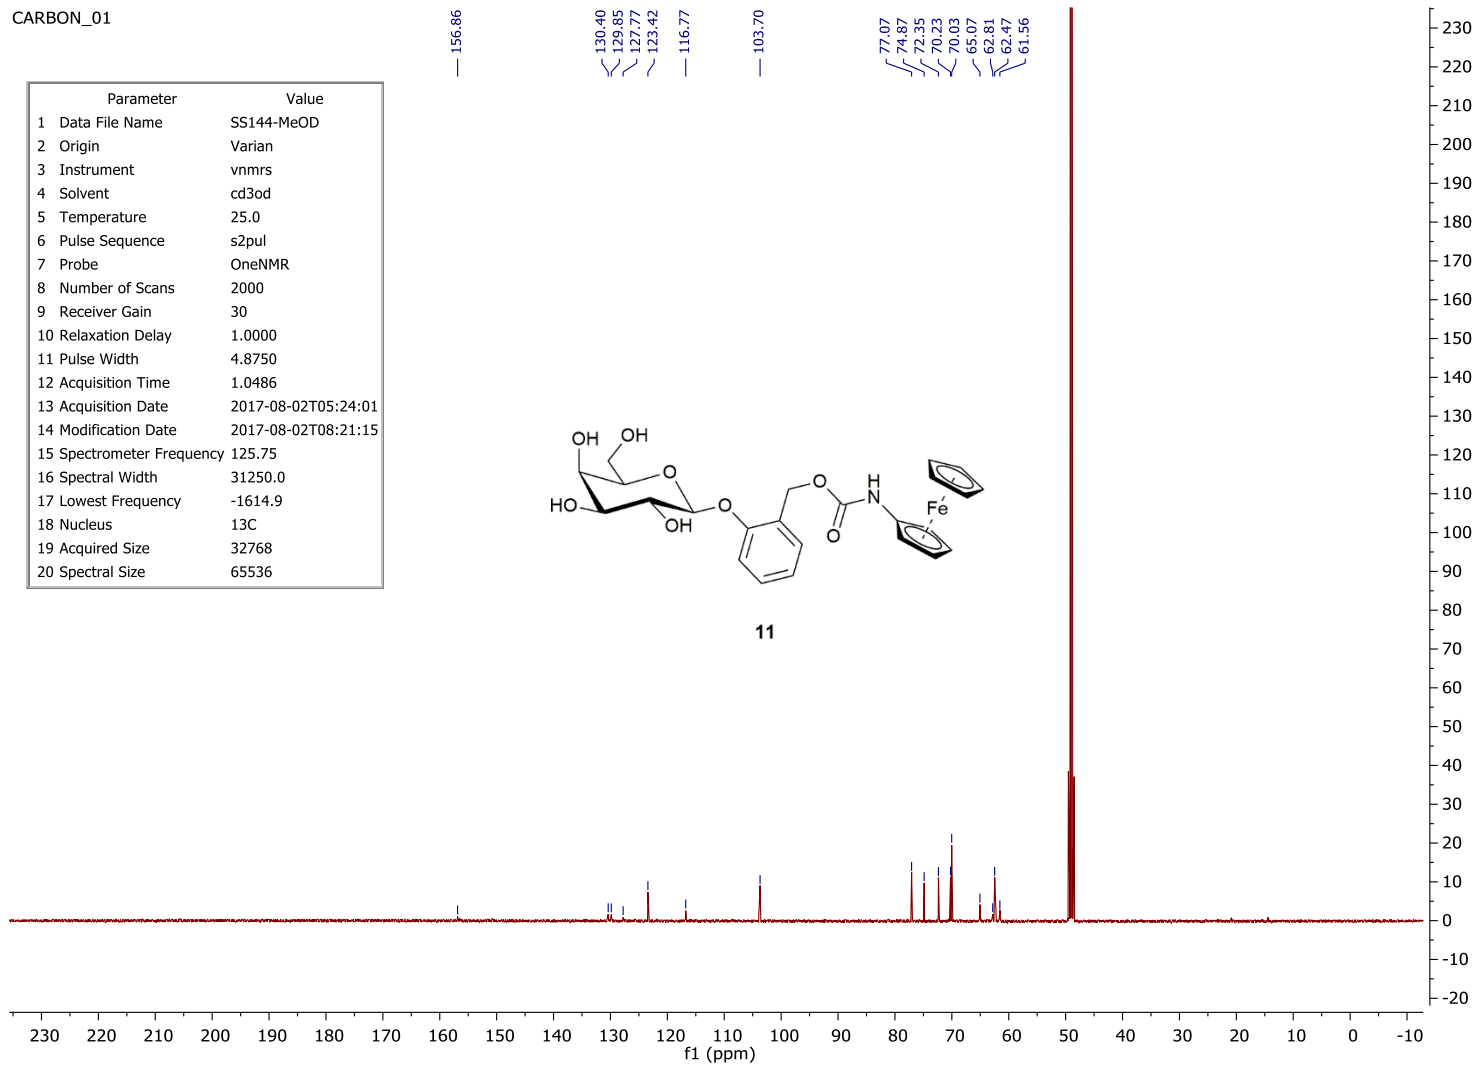

Supplement: c7ob01593c1.pdf [file c7ob01593c1.pdf]
